# Supplementary material
Source: PubMed Central journal article supplement (PMC4475352)
Supplement: NIHMS676556-supplement-2.pdf [file NIHMS676556-supplement-2.pdf]

## **Drugs**

acetyldigitoxin  
amiloride  
amiodarone  
amlodipine  
amrinone  
aspirin  
atenolol  
atorvastatin  
atropine  
benazepril  
bepridil  
bisoprolol  
bosentan  
bumetanide  
candesartan  
captopril  
carvedilol  
cerivastatin  
chlorothiazide  
chlorthalidone  
clonidine  
clopidogrel  
cyclothiazide  
dabigatran  
dicumarol  
digitoxin  
digoxin  
diltiazem  
dobutamine  
dofetilide  
doxazosin  
dronedarone  
enalapril  
eptifibatide  
felodipine  
fenofibrate  
flecainide  
fluvastatin  
furosemide  
hydralazine  
hydrochlorothiazide  
irbesartan  
isoprenaline  
lisinopril  
losartan

lovastatin  
methyldopa  
metoprolol  
mexiletine  
niacin  
nifedipine  
olmesartan  
oxprenolol  
perindopril  
phenprocoumon  
pindolol  
prasugrel  
pravastatin  
quinapril  
quinethazone  
ramipril  
rosuvastatin  
simvastatin  
spironolactone  
ticagrelor  
ticlopidine  
tirofiban  
torsemide  
valsartan  
verapamil  
warfarin
