# Supplementary material
Source: PubMed Central journal article supplement (PMC4475352)
Supplement: NIHMS676556-supplement-4.pdf [file NIHMS676556-supplement-4.pdf]

| Drug              | Variant                                                | PMID            | Journal                                                                | Year        | IF           |
|-------------------|--------------------------------------------------------|-----------------|------------------------------------------------------------------------|-------------|--------------|
| Amiodarone        | rs1057910                                              | 18950464        | British journal of haematology                                         | 2008        | 4.942        |
| Amiodarone        | rs1799853                                              | 18950464        | British journal of haematology                                         | 2008        | 4.942        |
| Amiodarone        | rs9923231                                              | 18950464        | British journal of haematology                                         | 2008        | 4.942        |
| Amlodipine        | rs1045642                                              | 16869811        | British journal of clinical pharmacology                               | 2007        | 3.063        |
| Amlodipine        | rs10494366                                             | 19076153        | British journal of clinical pharmacology                               | 2009        | 3.063        |
| Amlodipine        | rs1799752                                              | 20577119        | Journal of hypertension                                                | 2010        | 3.98         |
| Amlodipine        | rs2032582                                              | 16869811        | British journal of clinical pharmacology                               | 2007        | 3.063        |
| Amlodipine        | rs2228576                                              | 20577119        | Journal of hypertension                                                | 2010        | 3.98         |
| <b>Amlodipine</b> | <b>rs2238032</b>                                       | <b>16610939</b> | <b>Pharmacogenomics</b>                                                | <b>2006</b> | <b>3.876</b> |
| <b>Amlodipine</b> | <b>rs2239050</b>                                       | <b>16610939</b> | <b>Pharmacogenomics</b>                                                | <b>2006</b> | <b>3.876</b> |
| <b>Amlodipine</b> | <b>rs2239128</b>                                       | <b>16610939</b> | <b>Pharmacogenomics</b>                                                | <b>2006</b> | <b>3.876</b> |
| <b>Amlodipine</b> | <b>rs2246709</b>                                       | <b>19907160</b> | <b>American journal of nephrology</b>                                  | <b>2010</b> | <b>2.658</b> |
| Amlodipine        | rs2740574                                              | 19907160        | American journal of nephrology                                         | 2010        | 2.658        |
| Amlodipine        | rs4291                                                 | 20577119        | Journal of hypertension                                                | 2010        | 3.98         |
| Amlodipine        | rs5051                                                 | 17608790        | Annals of human genetics                                               | 2007        | 2.604        |
| Amlodipine        | rs5065                                                 | 18212314        | JAMA : the journal of the American Medical Association                 | 2008        | 30.011       |
| Amlodipine        | rs776746                                               | 17178265        | Clinical pharmacology and therapeutics                                 | 2006        | 6.378        |
| Amlodipine        | rs776746                                               | 19907160        | American journal of nephrology                                         | 2010        | 2.658        |
| Aspirin           | ADORA3 -1050G>T                                        | 20716228        | The British journal of dermatology                                     | 2010        | 4.353        |
| Aspirin           | ADORA3 -1050G>T/rs1544224 haplotype                    | 20716228        | The British journal of dermatology                                     | 2010        | 4.353        |
| Aspirin           | AGTR1 -521C>T                                          | 20824505        | Digestive diseases and sciences                                        | 2011        | 2.06         |
| Aspirin           | ALOX5 -1708G>A                                         | 16361798        | Journal of Korean medical science                                      | 2005        | 0.834        |
| Aspirin           | ALOX5 1728G>A                                          | 14749922        | Human genetics                                                         | 2004        | 5.047        |
| Aspirin           | ALOX5 1728G>A                                          | 16361798        | Journal of Korean medical science                                      | 2005        | 0.834        |
| Aspirin           | ALOX5 270G>A                                           | 16361798        | Journal of Korean medical science                                      | 2005        | 0.834        |
| Aspirin           | ALOX5-ht1 haplotype                                    | 14749922        | Human genetics                                                         | 2004        | 5.047        |
| Aspirin           | CCR3 -520T>G                                           | 18379861        | Journal of clinical immunology                                         | 2008        | 3.326        |
| Aspirin           | CRTH2 -466T>C                                          | 19796209        | Allergy                                                                | 2010        | 6.297        |
| Aspirin           | CYSLTR2 2078C>T                                        | 15970796        | Pharmacogenetics and genomics                                          | 2005        | 3.865        |
| Aspirin           | EP2 -10814T>A                                          | 15496426        | Human molecular genetics                                               | 2004        | 8.058        |
| Aspirin           | EP2 -12813G>A                                          | 15496426        | Human molecular genetics                                               | 2004        | 8.058        |
| Aspirin           | EP2 -6179A>G                                           | 15496426        | Human molecular genetics                                               | 2004        | 8.058        |
| Aspirin           | HLA-DPB1*0301                                          | 15898979        | Clinical and experimental allergy : journal of the British Society for | 2005        | 4.195        |
| Aspirin           | HLA-DQA1*0201                                          | 10718431        | The Laryngoscope                                                       | 2000        | 2.096        |
| Aspirin           | HLA-DQB1*0202                                          | 10718431        | The Laryngoscope                                                       | 2000        | 2.096        |
| Aspirin           | IL-10 -509C>T                                          | 19222424        | Allergy                                                                | 2009        | 6.297        |
| Aspirin           | ODC1 315G>A                                            | 17047198        | Journal of the National Cancer Institute                               | 2006        | 14.697       |
| Aspirin           | ODC1 316G>A                                            | 18413818        | Clinical cancer research : an official journal of the American Associ  | 2008        | 7.338        |
| Aspirin           | PTGER4 -1254A>G                                        | 17496729        | Pharmacogenetics and genomics                                          | 2007        | 3.865        |
| Aspirin           | rs10116901                                             | 20529293        | BMC medical genomics                                                   | 2010        | 3.766        |
| Aspirin           | rs1021410                                              | 20513247        | BMC pulmonary medicine                                                 | 2010        |              |
| Aspirin           | rs1021411                                              | 20513247        | BMC pulmonary medicine                                                 | 2010        |              |
| Aspirin           | rs10306114                                             | 16493486        | Thrombosis and haemostasis                                             | 2006        | 4.701        |
| Aspirin           | rs10306114/rs1236913/rs3842788/rs5788/rs5789 haplotype | 16150050        | Journal of thrombosis and haemostasis : JTH                            | 2005        |              |
| Aspirin           | rs1042713                                              | 18379861        | Journal of clinical immunology                                         | 2008        | 3.326        |
| Aspirin           | rs1050891                                              | 19178400        | Allergy                                                                | 2009        | 6.297        |
| Aspirin           | rs10520144                                             | 20513247        | BMC pulmonary medicine                                                 | 2010        |              |
| Aspirin           | rs1053744                                              | 21072201        | PLoS one                                                               | 2010        | 4.411        |
| Aspirin           | rs1062535                                              | 17157856        | Atherosclerosis                                                        | 2008        | 4.086        |
| Aspirin           | rs1065776                                              | 17559347        | Pharmacogenomics                                                       | 2007        | 3.876        |
| Aspirin           | rs10776727                                             | 19019667        | Respiratory medicine                                                   | 2009        | 2.525        |
| Aspirin           | rs10920568                                             | 19019667        | Respiratory medicine                                                   | 2009        | 2.525        |
| Aspirin           | rs11024665                                             | 20529293        | BMC medical genomics                                                   | 2010        | 3.766        |
| Aspirin           | rs11032080                                             | 20529293        | BMC medical genomics                                                   | 2010        | 3.766        |
| Aspirin           | rs1105879/rs2070959 haplotype                          | 17622933        | Pharmacogenetics and genomics                                          | 2007        | 3.865        |
| Aspirin           | rs1105879/rs2070959 haplotype                          | 19262071        | Pharmacology                                                           | 2009        | 1.802        |
| Aspirin           | rs11060167                                             | 21072201        | PLoS one                                                               | 2010        | 4.411        |
| Aspirin           | rs1126510                                              | 17496729        | Pharmacogenetics and genomics                                          | 2007        | 3.865        |
| Aspirin           | rs1126643                                              | 16214444        | The American journal of cardiology                                     | 2005        | 3.681        |
| Aspirin           | rs1126643                                              | 17157856        | Atherosclerosis                                                        | 2008        | 4.086        |
| Aspirin           | rs1131882                                              | 15898979        | Clinical and experimental allergy : journal of the British Society for | 2005        | 4.195        |
| Aspirin           | rs1131882                                              | 17496729        | Pharmacogenetics and genomics                                          | 2007        | 3.865        |
| Aspirin           | rs1143627                                              | 19448967        | Journal of gastroenterology                                            | 2009        | 3.61         |
| Aspirin           | rs11587213                                             | 18534082        | Allergy and asthma proceedings : the official journal of regional an   | 2008        | 1.735        |
| Aspirin           | rs11587213                                             | 18595682        | Respiratory medicine                                                   | 2008        | 2.525        |
| Aspirin           | rs11688145                                             | 19489917        | Clinical and experimental allergy : journal of the British Society for | 2009        | 4.195        |
| Aspirin           | rs12365876                                             | 20529293        | BMC medical genomics                                                   | 2010        | 3.766        |
| Aspirin           | rs12440567                                             | 20513247        | BMC pulmonary medicine                                                 | 2010        |              |
| Aspirin           | rs12442952                                             | 20513247        | BMC pulmonary medicine                                                 | 2010        |              |
| Aspirin           | rs1254598                                              | 15496426        | Human molecular genetics                                               | 2004        | 8.058        |
| Aspirin           | rs12911842                                             | 20513247        | BMC pulmonary medicine                                                 | 2010        |              |
| Aspirin           | rs13272289                                             | 20529293        | BMC medical genomics                                                   | 2010        | 3.766        |
| Aspirin           | rs1353411                                              | 15496426        | Human molecular genetics                                               | 2004        | 8.058        |
| Aspirin           | rs1353411                                              | 17496729        | Pharmacogenetics and genomics                                          | 2007        | 3.865        |
| Aspirin           | rs1436634                                              | 20529293        | BMC medical genomics                                                   | 2010        | 3.766        |
| Aspirin           | rs1441586                                              | 16839402        | Clinical and experimental allergy : journal of the British Society for | 2006        | 4.195        |
| Aspirin           | rs1441586                                              | 18379861        | Journal of clinical immunology                                         | 2008        | 3.326        |
| Aspirin           | rs1458072                                              | 20529293        | BMC medical genomics                                                   | 2010        | 3.766        |
| Aspirin           | rs1485187                                              | 20529293        | BMC medical genomics                                                   | 2010        | 3.766        |
| Aspirin           | rs1534446                                              | 20529293        | BMC medical genomics                                                   | 2010        | 3.766        |
| Aspirin           | rs1544224                                              | 19019667        | Respiratory medicine                                                   | 2009        | 2.525        |

|         |                              |          |                                                                                                                         |      |        |
|---------|------------------------------|----------|-------------------------------------------------------------------------------------------------------------------------|------|--------|
| Aspirin | rs1613662                    | 16493486 | Thrombosis and haemostasis                                                                                              | 2006 | 4.701  |
| Aspirin | rs1676780                    | 20529293 | BMC medical genomics                                                                                                    | 2010 | 3.766  |
| Aspirin | rs16851030                   | 19019667 | Respiratory medicine                                                                                                    | 2009 | 2.525  |
| Aspirin | rs16925150                   | 20529293 | BMC medical genomics                                                                                                    | 2010 | 3.766  |
| Aspirin | rs16940502                   | 20529293 | BMC medical genomics                                                                                                    | 2010 | 3.766  |
| Aspirin | rs16944                      | 19448967 | Journal of gastroenterology                                                                                             | 2009 | 3.61   |
| Aspirin | rs16969802                   | 20513247 | BMC pulmonary medicine                                                                                                  | 2010 |        |
| Aspirin | rs17029861                   | 20529293 | BMC medical genomics                                                                                                    | 2010 | 3.766  |
| Aspirin | rs1776122                    | 20529293 | BMC medical genomics                                                                                                    | 2010 | 3.766  |
| Aspirin | rs1799724                    | 19250144 | Journal of clinical pharmacy and therapeutics                                                                           | 2009 | 1.649  |
| Aspirin | rs1799964                    | 19250144 | Journal of clinical pharmacy and therapeutics                                                                           | 2009 | 1.649  |
| Aspirin | rs1800469                    | 16916603 | Respiratory medicine                                                                                                    | 2007 | 2.525  |
| Aspirin | rs1800469                    | 19138248 | Journal of clinical pharmacy and therapeutics                                                                           | 2008 | 1.649  |
| Aspirin | rs1800629                    | 17516296 | Experimental and clinical endocrinology & diabetes : official journal of the European Association of Endocrinologists   | 2007 | 1.826  |
| Aspirin | rs1800629                    | 19250144 | Journal of clinical pharmacy and therapeutics                                                                           | 2009 | 1.649  |
| Aspirin | rs1800630                    | 19250144 | Journal of clinical pharmacy and therapeutics                                                                           | 2009 | 1.649  |
| Aspirin | rs1800896                    | 19222424 | Allergy                                                                                                                 | 2009 | 6.297  |
| Aspirin | rs1800925                    | 20358028 | Allergy, asthma & immunology research                                                                                   | 2010 |        |
| Aspirin | rs1801282/rs3856806          | 20224667 | Allergy, asthma & immunology research                                                                                   | 2009 |        |
| Aspirin | rs1881457                    | 20358028 | Allergy, asthma & immunology research                                                                                   | 2010 |        |
| Aspirin | rs192808                     | 20860846 | BMC medical genetics                                                                                                    | 2010 | 2.439  |
| Aspirin | rs1932523                    | 21072201 | PloS one                                                                                                                | 2010 | 4.411  |
| Aspirin | rs1946518                    | 21692767 | The British journal of dermatology                                                                                      | 2011 | 4.353  |
| Aspirin | rs1946518/rs187238 haplotype | 21692767 | The British journal of dermatology                                                                                      | 2011 | 4.353  |
| Aspirin | rs1994882                    | 20529293 | BMC medical genomics                                                                                                    | 2010 | 3.766  |
| Aspirin | rs20417                      | 15604423 | Stroke; a journal of cerebral circulation                                                                               | 2005 | 5.756  |
| Aspirin | rs20541                      | 20358028 | Allergy, asthma & immunology research                                                                                   | 2010 |        |
| Aspirin | rs2075797                    | 15496426 | Human molecular genetics                                                                                                | 2004 | 8.058  |
| Aspirin | rs2075797                    | 17496729 | Pharmacogenetics and genomics                                                                                           | 2007 | 3.865  |
| Aspirin | rs2112172                    | 20529293 | BMC medical genomics                                                                                                    | 2010 | 3.766  |
| Aspirin | rs2252867                    | 21072201 | PloS one                                                                                                                | 2010 | 4.411  |
| Aspirin | rs2294752                    | 20831471 | The Journal of asthma : official journal of the Association for the Control of Allergy and Clinical Immunology          | 2010 | 1.341  |
| Aspirin | rs2295017                    | 21072201 | PloS one                                                                                                                | 2010 | 4.411  |
| Aspirin | rs2298191                    | 19019667 | Respiratory medicine                                                                                                    | 2009 | 2.525  |
| Aspirin | rs2302647                    | 21072201 | PloS one                                                                                                                | 2010 | 4.411  |
| Aspirin | rs2373201                    | 20529293 | BMC medical genomics                                                                                                    | 2010 | 3.766  |
| Aspirin | rs2407249                    | 15970796 | Pharmacogenetics and genomics                                                                                           | 2005 | 3.865  |
| Aspirin | rs2412426                    | 20513247 | BMC pulmonary medicine                                                                                                  | 2010 |        |
| Aspirin | rs2427827                    | 17125826 | The Journal of allergy and clinical immunology                                                                          | 2007 | 9.273  |
| Aspirin | rs2427827                    | 18595682 | Respiratory medicine                                                                                                    | 2008 | 2.525  |
| Aspirin | rs2564978                    | 21072201 | PloS one                                                                                                                | 2010 | 4.411  |
| Aspirin | rs2576932                    | 20513247 | BMC pulmonary medicine                                                                                                  | 2010 |        |
| Aspirin | rs2637204                    | 16630147 | Clinical and experimental allergy : journal of the British Society for Allergy and Clinical Immunology                  | 2006 | 4.195  |
| Aspirin | rs2723087                    | 21072201 | PloS one                                                                                                                | 2010 | 4.411  |
| Aspirin | rs2768759                    | 18511696 | Arteriosclerosis, thrombosis, and vascular biology                                                                      | 2008 | 7.215  |
| Aspirin | rs2806489                    | 16630147 | Clinical and experimental allergy : journal of the British Society for Allergy and Clinical Immunology                  | 2006 | 4.195  |
| Aspirin | rs2971589                    | 20529293 | BMC medical genomics                                                                                                    | 2010 | 3.766  |
| Aspirin | rs2982510                    | 20831471 | The Journal of asthma : official journal of the Association for the Control of Allergy and Clinical Immunology          | 2010 | 1.341  |
| Aspirin | rs316021                     | 21346370 | International archives of allergy and immunology                                                                        | 2011 | 2.235  |
| Aspirin | rs321029                     | 16630147 | Clinical and experimental allergy : journal of the British Society for Allergy and Clinical Immunology                  | 2006 | 4.195  |
| Aspirin | rs321029                     | 18379861 | Journal of clinical immunology                                                                                          | 2008 | 3.326  |
| Aspirin | rs3213729                    | 21072201 | PloS one                                                                                                                | 2010 | 4.411  |
| Aspirin | rs361525                     | 19250144 | Journal of clinical pharmacy and therapeutics                                                                           | 2009 | 1.649  |
| Aspirin | rs3775291                    | 21461252 | Allergy, asthma & immunology research                                                                                   | 2011 |        |
| Aspirin | rs3775296                    | 21461252 | Allergy, asthma & immunology research                                                                                   | 2011 |        |
| Aspirin | rs3802122                    | 20934631 | Annals of allergy, asthma & immunology : official publication of the American Academy of Allergy, Asthma and Immunology | 2010 | 2.801  |
| Aspirin | rs3810340                    | 20529293 | BMC medical genomics                                                                                                    | 2010 | 3.766  |
| Aspirin | rs3842787                    | 15604423 | Stroke; a journal of cerebral circulation                                                                               | 2005 | 5.756  |
| Aspirin | rs3842787                    | 17184645 | The Annals of thoracic surgery                                                                                          | 2007 | 3.792  |
| Aspirin | rs3856806                    | 20224667 | Allergy, asthma & immunology research                                                                                   | 2009 |        |
| Aspirin | rs3918242                    | 19958602 | American journal of rhinology & allergy                                                                                 | 2009 |        |
| Aspirin | rs4115216                    | 20513247 | BMC pulmonary medicine                                                                                                  | 2010 |        |
| Aspirin | rs4244285                    | 18004210 | Pharmacogenetics and genomics                                                                                           | 2007 | 3.865  |
| Aspirin | rs4244285                    | 21168310 | Journal of cardiology                                                                                                   | 2011 | 1.175  |
| Aspirin | rs4245976                    | 21072201 | PloS one                                                                                                                | 2010 | 4.411  |
| Aspirin | rs4271002                    | 20602614 | Pharmacogenomics                                                                                                        | 2010 | 3.876  |
| Aspirin | rs4281830                    | 20529293 | BMC medical genomics                                                                                                    | 2010 | 3.766  |
| Aspirin | rs4291                       | 18727619 | Clinical and experimental allergy : journal of the British Society for Allergy and Clinical Immunology                  | 2008 | 4.195  |
| Aspirin | rs4292                       | 18727619 | Clinical and experimental allergy : journal of the British Society for Allergy and Clinical Immunology                  | 2008 | 4.195  |
| Aspirin | rs446738                     | 20831471 | The Journal of asthma : official journal of the Association for the Control of Allergy and Clinical Immunology          | 2010 | 1.341  |
| Aspirin | rs4523                       | 17245331 | The pharmacogenomics journal                                                                                            | 2007 | 4.306  |
| Aspirin | rs4612666                    | 19767079 | The Journal of allergy and clinical immunology                                                                          | 2009 | 9.273  |
| Aspirin | rs4867084                    | 21072201 | PloS one                                                                                                                | 2010 | 4.411  |
| Aspirin | rs4923838                    | 20513247 | BMC pulmonary medicine                                                                                                  | 2010 |        |
| Aspirin | rs4924379                    | 20513247 | BMC pulmonary medicine                                                                                                  | 2010 |        |
| Aspirin | rs4924383                    | 20513247 | BMC pulmonary medicine                                                                                                  | 2010 |        |
| Aspirin | rs499368                     | 20597903 | Annals of human genetics                                                                                                | 2010 | 2.604  |
| Aspirin | rs5050                       | 20824505 | Digestive diseases and sciences                                                                                         | 2011 | 2.06   |
| Aspirin | rs557881                     | 20597903 | Annals of human genetics                                                                                                | 2010 | 2.604  |
| Aspirin | rs569108                     | 18534082 | Allergy and asthma proceedings : the official journal of regional allergists and immunologists                          | 2008 | 1.735  |
| Aspirin | rs5918                       | 10459913 | Lancet                                                                                                                  | 1999 | 33.633 |
| Aspirin | rs5918                       | 10704169 | Circulation                                                                                                             | 2000 | 14.432 |

|                 |                                                                                 |                 |                                                                                                                                                            |             |              |
|-----------------|---------------------------------------------------------------------------------|-----------------|------------------------------------------------------------------------------------------------------------------------------------------------------------|-------------|--------------|
| Aspirin         | rs5918                                                                          | 11054089        | British journal of haematology                                                                                                                             | 2000        | 4.942        |
| Aspirin         | rs5918                                                                          | 11723016        | Circulation                                                                                                                                                | 2001        | 14.432       |
| Aspirin         | rs5918                                                                          | 15840736        | The Annals of pharmacotherapy                                                                                                                              | 2005        | 2.166        |
| Aspirin         | rs5918                                                                          | 16153930        | The Journal of thoracic and cardiovascular surgery                                                                                                         | 2005        | 3.608        |
| Aspirin         | rs5918                                                                          | 16458133        | Journal of the American College of Cardiology                                                                                                              | 2006        | 14.293       |
| Aspirin         | rs5918                                                                          | 16675000        | Thrombosis research                                                                                                                                        | 2007        | 2.372        |
| Aspirin         | rs5918                                                                          | 17184645        | The Annals of thoracic surgery                                                                                                                             | 2007        | 3.792        |
| Aspirin         | rs5918                                                                          | 20138334        | Thrombosis research                                                                                                                                        | 2010        | 2.372        |
| Aspirin         | rs5985                                                                          | 12515735        | Circulation                                                                                                                                                | 2003        | 14.432       |
| Aspirin         | rs6025934                                                                       | 20529293        | BMC medical genomics                                                                                                                                       | 2010        | 3.766        |
| Aspirin         | rs6065                                                                          | 17245331        | The pharmacogenomics journal                                                                                                                               | 2007        | 4.306        |
| Aspirin         | rs6065                                                                          | 18417193        | Thrombosis research                                                                                                                                        | 2008        | 2.372        |
| Aspirin         | rs6492915                                                                       | 20513247        | BMC pulmonary medicine                                                                                                                                     | 2010        |              |
| Aspirin         | rs6498124                                                                       | 21072201        | PLoS one                                                                                                                                                   | 2010        | 4.411        |
| Aspirin         | rs6583759                                                                       | 20529293        | BMC medical genomics                                                                                                                                       | 2010        | 3.766        |
| Aspirin         | rs6741255                                                                       | 21072201        | PLoS one                                                                                                                                                   | 2010        | 4.411        |
| Aspirin         | rs6764798                                                                       | 20529293        | BMC medical genomics                                                                                                                                       | 2010        | 3.766        |
| Aspirin         | rs6796806                                                                       | 20529293        | BMC medical genomics                                                                                                                                       | 2010        | 3.766        |
| Aspirin         | rs6917811                                                                       | 20529293        | BMC medical genomics                                                                                                                                       | 2010        | 3.766        |
| Aspirin         | rs6962291                                                                       | 21449675        | Pharmacogenomics                                                                                                                                           | 2011        | 3.876        |
| Aspirin         | rs6979947                                                                       | 20934631        | Annals of allergy, asthma & immunology : official publication of the                                                                                       | 2010        | 2.801        |
| Aspirin         | rs701265                                                                        | 17559347        | Pharmacogenomics                                                                                                                                           | 2007        | 3.876        |
| Aspirin         | rs7045878                                                                       | 20529293        | BMC medical genomics                                                                                                                                       | 2010        | 3.766        |
| Aspirin         | rs7079291                                                                       | 20529293        | BMC medical genomics                                                                                                                                       | 2010        | 3.766        |
| Aspirin         | rs7179417                                                                       | 20513247        | BMC pulmonary medicine                                                                                                                                     | 2010        |              |
| Aspirin         | rs7179742                                                                       | 20513247        | BMC pulmonary medicine                                                                                                                                     | 2010        |              |
| <b>Aspirin</b>  | <b>rs730012</b>                                                                 | <b>15100686</b> | <b>The Journal of allergy and clinical immunology</b>                                                                                                      | <b>2004</b> | <b>9.273</b> |
| <b>Aspirin</b>  | <b>rs730012</b>                                                                 | <b>15970796</b> | <b>Pharmacogenetics and genomics</b>                                                                                                                       | <b>2005</b> | <b>3.865</b> |
| <b>Aspirin</b>  | <b>rs730012</b>                                                                 | <b>19862937</b> | <b>Journal of investigational allergology &amp; clinical immunology : official publication of the American College of Allergy, Asthma &amp; Immunology</b> | <b>2009</b> | <b>1.489</b> |
| Aspirin         | rs7324991                                                                       | 15970796        | Pharmacogenetics and genomics                                                                                                                              | 2005        | 3.865        |
| Aspirin         | rs7543182                                                                       | 20587336        | BMB reports                                                                                                                                                | 2010        | 2.167        |
| Aspirin         | rs7551789                                                                       | 17496729        | Pharmacogenetics and genomics                                                                                                                              | 2007        | 3.865        |
| Aspirin         | rs7572857                                                                       | 21072201        | PLoS one                                                                                                                                                   | 2010        | 4.411        |
| Aspirin         | rs7712189                                                                       | 20529293        | BMC medical genomics                                                                                                                                       | 2010        | 3.766        |
| Aspirin         | rs7820268                                                                       | 19489917        | Clinical and experimental allergy : journal of the British Society for Allergy and Clinical Immunology                                                     | 2009        | 4.195        |
| Aspirin         | rs8031241                                                                       | 20513247        | BMC pulmonary medicine                                                                                                                                     | 2010        |              |
| Aspirin         | rs8032864                                                                       | 20513247        | BMC pulmonary medicine                                                                                                                                     | 2010        |              |
| Aspirin         | rs8033957                                                                       | 20513247        | BMC pulmonary medicine                                                                                                                                     | 2010        |              |
| Aspirin         | rs8035291                                                                       | 20513247        | BMC pulmonary medicine                                                                                                                                     | 2010        |              |
| Aspirin         | rs8104319                                                                       | 20529293        | BMC medical genomics                                                                                                                                       | 2010        | 3.766        |
| Aspirin         | rs828616                                                                        | 21072201        | PLoS one                                                                                                                                                   | 2010        | 4.411        |
| Aspirin         | rs912278                                                                        | 15970796        | Pharmacogenetics and genomics                                                                                                                              | 2005        | 3.865        |
| Aspirin         | rs917652                                                                        | 20529293        | BMC medical genomics                                                                                                                                       | 2010        | 3.766        |
| Aspirin         | rs936368                                                                        | 20529293        | BMC medical genomics                                                                                                                                       | 2010        | 3.766        |
| Aspirin         | rs959                                                                           | 20587336        | BMB reports                                                                                                                                                | 2010        | 2.167        |
| Aspirin         | TBX21 -1993T>C                                                                  | 15806396        | Human genetics                                                                                                                                             | 2005        | 5.047        |
| Aspirin         | TBXA2R -4684T>C                                                                 | 17496729        | Pharmacogenetics and genomics                                                                                                                              | 2007        | 3.865        |
| Aspirin         | TBXA2R -4684T>C                                                                 | 21070398        | Clinical and experimental allergy : journal of the British Society for Allergy and Clinical Immunology                                                     | 2011        | 4.195        |
| Atenolol        | BDKR82 + and - alleles (presence/absence of a 21 to 29 nonanucleotide sequence) | 12640257        | Journal of hypertension                                                                                                                                    | 2003        | 3.98         |
| Atenolol        | rs1051375                                                                       | 20031608        | Circulation. Cardiovascular genetics                                                                                                                       | 2009        |              |
| Atenolol        | rs11014166                                                                      | 21156931        | Circulation. Cardiovascular genetics                                                                                                                       | 2010        |              |
| <b>Atenolol</b> | <b>rs11064426</b>                                                               | <b>20235788</b> | <b>Pharmacogenomics</b>                                                                                                                                    | <b>2010</b> | <b>3.876</b> |
| Atenolol        | rs1799752                                                                       | 8538349         | Lancet                                                                                                                                                     | 1996        | 33.633       |
| Atenolol        | rs1800545                                                                       | 15614026        | Journal of hypertension                                                                                                                                    | 2004        | 3.98         |
| Atenolol        | rs1801252                                                                       | 18794726        | Pharmacogenetics and genomics                                                                                                                              | 2008        | 3.865        |
| Atenolol        | rs1801252                                                                       | 19842931        | Pharmacogenomics                                                                                                                                           | 2009        | 3.876        |
| <b>Atenolol</b> | <b>rs1801252/rs1801253 haplotype</b>                                            | <b>18615004</b> | <b>Clinical pharmacology and therapeutics</b>                                                                                                              | <b>2008</b> | <b>6.378</b> |
| Atenolol        | rs1801253                                                                       | 12709726        | Clinical pharmacology and therapeutics                                                                                                                     | 2003        | 6.378        |
| Atenolol        | rs1801253                                                                       | 18794726        | Pharmacogenetics and genomics                                                                                                                              | 2008        | 3.865        |
| Atenolol        | rs1801253                                                                       | 19842931        | Pharmacogenomics                                                                                                                                           | 2009        | 3.876        |
| <b>Atenolol</b> | <b>rs2301339</b>                                                                | <b>20235788</b> | <b>Pharmacogenomics</b>                                                                                                                                    | <b>2010</b> | <b>3.876</b> |
| Atenolol        | rs2357928                                                                       | 21156931        | Circulation. Cardiovascular genetics                                                                                                                       | 2010        |              |
| Atenolol        | rs4253778                                                                       | 18855529        | Pharmacogenomics                                                                                                                                           | 2008        | 3.876        |
| <b>Atenolol</b> | <b>rs5051</b>                                                                   | <b>14700505</b> | <b>American journal of hypertension</b>                                                                                                                    | <b>2004</b> | <b>3.129</b> |
| Atenolol        | rs5370                                                                          | 15188945        | Clinical cardiology                                                                                                                                        | 2004        | 1.807        |
| <b>Atenolol</b> | <b>rs5443</b>                                                                   | <b>20235788</b> | <b>Pharmacogenomics</b>                                                                                                                                    | <b>2010</b> | <b>3.876</b> |
| <b>Atenolol</b> | <b>rs688</b>                                                                    | <b>15453913</b> | <b>BMC cardiovascular disorders</b>                                                                                                                        | <b>2004</b> | <b>2.021</b> |
| <b>Atenolol</b> | <b>rs699</b>                                                                    | <b>14700505</b> | <b>American journal of hypertension</b>                                                                                                                    | <b>2004</b> | <b>3.129</b> |
| Atorvastatin    | ABC81 -41A>G                                                                    | 20578904        | DNA and cell biology                                                                                                                                       | 2010        | 2.159        |
| Atorvastatin    | APOA1 -2500C>T                                                                  | 20578904        | DNA and cell biology                                                                                                                                       | 2010        | 2.159        |
| Atorvastatin    | APOA1 PstI                                                                      | 20578904        | DNA and cell biology                                                                                                                                       | 2010        | 2.159        |
| Atorvastatin    | APOE SNP17                                                                      | 20031582        | Circulation. Cardiovascular genetics                                                                                                                       | 2009        |              |
| Atorvastatin    | CYP3AP1 -44G>A                                                                  | 20519697        | Journal of clinical pharmacology                                                                                                                           | 2011        | 3.59         |
| Atorvastatin    | CYP7A1 -204A>C                                                                  | 15262185        | Atherosclerosis                                                                                                                                            | 2004        | 4.086        |
| Atorvastatin    | CYP7A1 -204A>C                                                                  | 15910869        | Atherosclerosis                                                                                                                                            | 2005        | 4.086        |
| Atorvastatin    | CYP7A1 -204A>C                                                                  | 20578904        | DNA and cell biology                                                                                                                                       | 2010        | 2.159        |
| Atorvastatin    | CYP7A1 -204A>C                                                                  | 21128988        | Journal of clinical pharmacy and therapeutics                                                                                                              | 2011        | 1.649        |
| Atorvastatin    | LDLR 1646G>A                                                                    | 15864114        | Pharmacogenetics and genomics                                                                                                                              | 2005        | 3.865        |
| Atorvastatin    | LDLR 1775G>A                                                                    | 15864114        | Pharmacogenetics and genomics                                                                                                                              | 2005        | 3.865        |
| Atorvastatin    | LDLR 858C>A                                                                     | 15864114        | Pharmacogenetics and genomics                                                                                                                              | 2005        | 3.865        |
| Atorvastatin    | LOX-1 3'-UTRC>T                                                                 | 16285995        | Atherosclerosis                                                                                                                                            | 2005        | 4.086        |
| Atorvastatin    | LOX-1 3'-UTRC>T                                                                 | 17050011        | International journal of cardiology                                                                                                                        | 2007        | 6.802        |

|                     |                           |                 |                                                                          |             |               |
|---------------------|---------------------------|-----------------|--------------------------------------------------------------------------|-------------|---------------|
| Atorvastatin        | LOX-1 3'-UTRC>T           | 18173546        | European journal of clinical investigation                               | 2008        | 2.736         |
| Atorvastatin        | rs1001179                 | 19274593        | Free radical research                                                    | 2009        |               |
| Atorvastatin        | rs1011685                 | 20339536        | PloS one                                                                 | 2010        | 4.411         |
| Atorvastatin        | rs10134365                | 20031582        | Circulation. Cardiovascular genetics                                     | 2009        |               |
| Atorvastatin        | rs10413089                | 20031582        | Circulation. Cardiovascular genetics                                     | 2009        |               |
| Atorvastatin        | rs1045642                 | 19238649        | Clinical pharmacology and therapeutics                                   | 2008        | 6.378         |
| Atorvastatin        | rs1045642                 | 21392722        | Journal of clinical lipidology                                           | 2011        |               |
| Atorvastatin        | rs10474433                | 20031582        | Circulation. Cardiovascular genetics                                     | 2009        |               |
| Atorvastatin        | rs1065853                 | 20031582        | Circulation. Cardiovascular genetics                                     | 2009        |               |
| Atorvastatin        | rs1128503                 | 19238649        | Clinical pharmacology and therapeutics                                   | 2008        | 6.378         |
| Atorvastatin        | rs1154428                 | 20130232        | Circulation. Cardiovascular genetics                                     | 2010        |               |
| Atorvastatin        | rs11591147                | 20031582        | Circulation. Cardiovascular genetics                                     | 2009        |               |
| Atorvastatin        | rs11603831                | 20031582        | Circulation. Cardiovascular genetics                                     | 2009        |               |
| Atorvastatin        | rs11887534                | 14703505        | Journal of lipid research                                                | 2004        | 6.115         |
| Atorvastatin        | rs11887534                | 15262185        | Atherosclerosis                                                          | 2004        | 4.086         |
| Atorvastatin        | rs12003906                | 20031551        | Circulation. Cardiovascular genetics                                     | 2008        |               |
| Atorvastatin        | rs12487736                | 18435918        | Clinica chimica acta; international journal of clinical chemistry        | 2008        | 2.389         |
| Atorvastatin        | rs1260326                 | 20339536        | PloS one                                                                 | 2010        | 4.411         |
| Atorvastatin        | rs12681897                | 20031582        | Circulation. Cardiovascular genetics                                     | 2009        |               |
| Atorvastatin        | rs12772513                | 20031582        | Circulation. Cardiovascular genetics                                     | 2009        |               |
| Atorvastatin        | rs12796185                | 20031582        | Circulation. Cardiovascular genetics                                     | 2009        |               |
| Atorvastatin        | rs12916                   | 20578904        | DNA and cell biology                                                     | 2010        | 2.159         |
| Atorvastatin        | rs1402769                 | 20031582        | Circulation. Cardiovascular genetics                                     | 2009        |               |
| Atorvastatin        | rs1433099                 | 20031582        | Circulation. Cardiovascular genetics                                     | 2009        |               |
| Atorvastatin        | rs158990                  | 20031582        | Circulation. Cardiovascular genetics                                     | 2009        |               |
| Atorvastatin        | rs163574                  | 20031582        | Circulation. Cardiovascular genetics                                     | 2009        |               |
| Atorvastatin        | rs17238540                | 20578904        | DNA and cell biology                                                     | 2010        | 2.159         |
| Atorvastatin        | rs17671591                | 20031582        | Circulation. Cardiovascular genetics                                     | 2009        |               |
| Atorvastatin        | rs1799752                 | 16116691        | Thrombosis and haemostasis                                               | 2005        | 4.701         |
| Atorvastatin        | rs1800588                 | 20031582        | Circulation. Cardiovascular genetics                                     | 2009        |               |
| Atorvastatin        | rs1800591                 | 15864113        | Pharmacogenetics and genomics                                            | 2005        | 3.865         |
| Atorvastatin        | rs1800629                 | 18997459        | Annals of nutrition & metabolism                                         | 2008        | 2.173         |
| Atorvastatin        | rs1800775                 | 20578904        | DNA and cell biology                                                     | 2010        | 2.159         |
| Atorvastatin        | rs1800977                 | 19530967        | Pharmacogenomics                                                         | 2009        | 3.876         |
| Atorvastatin        | rs1883025                 | 20339536        | PloS one                                                                 | 2010        | 4.411         |
| Atorvastatin        | rs1935349                 | 17600820        | Muscle & nerve                                                           | 2007        | 2.302         |
| Atorvastatin        | rs2032582                 | 16103896        | The pharmacogenomics journal                                             | 2005        | 4.306         |
| Atorvastatin        | rs2032582                 | 18851956        | Biochemical pharmacology                                                 | 2009        | 4.889         |
| Atorvastatin        | rs2032582                 | 19238649        | Clinical pharmacology and therapeutics                                   | 2008        | 6.378         |
| <b>Atorvastatin</b> | <b>rs20455</b>            | <b>18222355</b> | <b>Journal of the American College of Cardiology</b>                     | <b>2008</b> | <b>14.293</b> |
| <b>Atorvastatin</b> | <b>rs20455</b>            | <b>20854963</b> | <b>The American journal of cardiology</b>                                | <b>2010</b> | <b>3.681</b>  |
| <b>Atorvastatin</b> | <b>rs20455</b>            | <b>20886236</b> | <b>Human genetics</b>                                                    | <b>2011</b> | <b>5.047</b>  |
| Atorvastatin        | rs2070744                 | 16938300        | Atherosclerosis                                                          | 2007        | 4.086         |
| Atorvastatin        | rs2070744                 | 16962929        | Free radical biology & medicine                                          | 2006        | 5.707         |
| Atorvastatin        | rs2070744                 | 19104789        | European journal of clinical pharmacology                                | 2009        | 3.032         |
| Atorvastatin        | rs2075650                 | 20031582        | Circulation. Cardiovascular genetics                                     | 2009        |               |
| Atorvastatin        | rs2080798                 | 20031582        | Circulation. Cardiovascular genetics                                     | 2009        |               |
| Atorvastatin        | rs2080799                 | 20031582        | Circulation. Cardiovascular genetics                                     | 2009        |               |
| Atorvastatin        | rs2229109                 | 20031582        | Circulation. Cardiovascular genetics                                     | 2009        |               |
| Atorvastatin        | rs2231142                 | 19474787        | Clinical pharmacology and therapeutics                                   | 2009        | 6.378         |
| Atorvastatin        | rs2242480                 | 18528690        | European journal of clinical pharmacology                                | 2008        | 3.032         |
| Atorvastatin        | rs2248540                 | 20031582        | Circulation. Cardiovascular genetics                                     | 2009        |               |
| Atorvastatin        | rs2253023                 | 20031582        | Circulation. Cardiovascular genetics                                     | 2009        |               |
| Atorvastatin        | rs2276307                 | 17600820        | Muscle & nerve                                                           | 2007        | 2.302         |
| Atorvastatin        | rs247616                  | 20339536        | PloS one                                                                 | 2010        | 4.411         |
| Atorvastatin        | rs2740574                 | 19802823        | Pharmacoepidemiology and drug safety                                     | 2010        | 2.342         |
| Atorvastatin        | rs2898879                 | 20031582        | Circulation. Cardiovascular genetics                                     | 2009        |               |
| Atorvastatin        | rs2912263                 | 20031582        | Circulation. Cardiovascular genetics                                     | 2009        |               |
| Atorvastatin        | rs2963162                 | 20031582        | Circulation. Cardiovascular genetics                                     | 2009        |               |
| Atorvastatin        | rs333                     | 20130232        | Circulation. Cardiovascular genetics                                     | 2010        |               |
| Atorvastatin        | rs34724                   | 20602615        | Pharmacogenomics                                                         | 2010        | 3.876         |
| Atorvastatin        | rs352046                  | 18769620        | PloS one                                                                 | 2008        | 4.411         |
| Atorvastatin        | rs3846662                 | 21427285        | Journal of clinical pharmacology                                         | 2011        | 3.59          |
| Atorvastatin        | rs3892097                 | 17700359        | Pharmacogenetics and genomics                                            | 2007        | 3.865         |
| Atorvastatin        | rs3901366                 | 20031582        | Circulation. Cardiovascular genetics                                     | 2009        |               |
| Atorvastatin        | rs405509                  | 20031582        | Circulation. Cardiovascular genetics                                     | 2009        |               |
| Atorvastatin        | rs4148217                 | 21128988        | Journal of clinical pharmacy and therapeutics                            | 2011        | 1.649         |
| <b>Atorvastatin</b> | <b>rs4149056</b>          | <b>17473846</b> | <b>Clinical pharmacology and therapeutics</b>                            | <b>2007</b> | <b>6.378</b>  |
| <b>Atorvastatin</b> | <b>rs4149056</b>          | <b>19374892</b> | <b>Clinica chimica acta; international journal of clinical chemistry</b> | <b>2009</b> | <b>2.389</b>  |
| <b>Atorvastatin</b> | <b>rs4149056</b>          | <b>19833260</b> | <b>Journal of the American College of Cardiology</b>                     | <b>2009</b> | <b>14.293</b> |
| Atorvastatin        | rs429358/rs7412 haplotype | 15910869        | Atherosclerosis                                                          | 2005        | 4.086         |
| Atorvastatin        | rs429358/rs7412 haplotype | 16103896        | The pharmacogenomics journal                                             | 2005        | 4.306         |
| Atorvastatin        | rs429358/rs7412 haplotype | 19667110        | Arteriosclerosis, thrombosis, and vascular biology                       | 2009        | 7.215         |
| Atorvastatin        | rs429358/rs7412 haplotype | 20031551        | Circulation. Cardiovascular genetics                                     | 2008        |               |
| Atorvastatin        | rs429358/rs7412 haplotype | 20031582        | Circulation. Cardiovascular genetics                                     | 2009        |               |
| Atorvastatin        | rs4341                    | 20031582        | Circulation. Cardiovascular genetics                                     | 2009        |               |
| Atorvastatin        | rs4420638                 | 20339536        | PloS one                                                                 | 2010        | 4.411         |
| Atorvastatin        | rs449647                  | 12059987        | European journal of clinical investigation                               | 2002        | 2.736         |
| Atorvastatin        | rs4739642                 | 20031582        | Circulation. Cardiovascular genetics                                     | 2009        |               |
| Atorvastatin        | rs4775041                 | 20339536        | PloS one                                                                 | 2010        | 4.411         |
| Atorvastatin        | rs4842213                 | 20031582        | Circulation. Cardiovascular genetics                                     | 2009        |               |
| Atorvastatin        | rs505151                  | 20031582        | Circulation. Cardiovascular genetics                                     | 2009        |               |

|                     |                  |                 |                                                                              |             |               |
|---------------------|------------------|-----------------|------------------------------------------------------------------------------|-------------|---------------|
| Atorvastatin        | rs5069           | 15694942        | Atherosclerosis                                                              | 2005        | 4.086         |
| Atorvastatin        | rs5069           | 16309370        | Clinical chemistry and laboratory medicine : CCLM / FESCC                    | 2005        | 2.069         |
| <b>Atorvastatin</b> | <b>rs5443</b>    | <b>18551043</b> | <b>Pharmacogenetics and genomics</b>                                         | <b>2008</b> | <b>3.865</b>  |
| Atorvastatin        | rs5882           | 20578904        | DNA and cell biology                                                         | 2010        | 2.159         |
| Atorvastatin        | rs5888           | 20064494        | Clinica chimica acta; international journal of clinical chemistry            | 2010        | 2.389         |
| Atorvastatin        | rs5908           | 20578904        | DNA and cell biology                                                         | 2010        | 2.159         |
| Atorvastatin        | rs5925           | 20031582        | Circulation. Cardiovascular genetics                                         | 2009        |               |
| Atorvastatin        | rs60282872       | 18435918        | Clinica chimica acta; international journal of clinical chemistry            | 2008        | 2.389         |
| Atorvastatin        | rs6453131        | 20031582        | Circulation. Cardiovascular genetics                                         | 2009        |               |
| Atorvastatin        | rs646776         | 20339536        | PLoS one                                                                     | 2010        | 4.411         |
| Atorvastatin        | rs662            | 16238680        | Journal of internal medicine                                                 | 2005        | 5.935         |
| Atorvastatin        | rs662799         | 19530961        | Pharmacogenomics                                                             | 2009        | 3.876         |
| Atorvastatin        | rs670            | 16309370        | Clinical chemistry and laboratory medicine : CCLM / FESCC                    | 2005        | 2.069         |
| Atorvastatin        | rs6790122        | 20031582        | Circulation. Cardiovascular genetics                                         | 2009        |               |
| Atorvastatin        | rs6791599        | 20130232        | Circulation. Cardiovascular genetics                                         | 2010        |               |
| Atorvastatin        | rs6808835        | 20130232        | Circulation. Cardiovascular genetics                                         | 2010        |               |
| Atorvastatin        | rs688            | 20031582        | Circulation. Cardiovascular genetics                                         | 2009        |               |
| Atorvastatin        | rs6973373        | 20031582        | Circulation. Cardiovascular genetics                                         | 2009        |               |
| Atorvastatin        | rs705379         | 16238680        | Journal of internal medicine                                                 | 2005        | 5.935         |
| Atorvastatin        | rs705379         | 19904013        | Pharmacological reports : PR                                                 | 2009        | 2.5           |
| Atorvastatin        | rs708272         | 12663600        | Diabetes care                                                                | 2003        | 7.141         |
| Atorvastatin        | rs708272         | 20578904        | DNA and cell biology                                                         | 2010        | 2.159         |
| Atorvastatin        | rs7259004        | 20031582        | Circulation. Cardiovascular genetics                                         | 2009        |               |
| Atorvastatin        | rs729319         | 20031582        | Circulation. Cardiovascular genetics                                         | 2009        |               |
| Atorvastatin        | rs7552841        | 20031582        | Circulation. Cardiovascular genetics                                         | 2009        |               |
| Atorvastatin        | rs7633531        | 20339536        | PLoS one                                                                     | 2010        | 4.411         |
| Atorvastatin        | rs776746         | 15284534        | Pharmacogenetics                                                             | 2004        |               |
| Atorvastatin        | rs776746         | 18727922        | Clinica chimica acta; international journal of clinical chemistry            | 2008        | 2.389         |
| Atorvastatin        | rs7988287        | 20031582        | Circulation. Cardiovascular genetics                                         | 2009        |               |
| Atorvastatin        | rs8014194        | 20339536        | PLoS one                                                                     | 2010        | 4.411         |
| Atorvastatin        | rs8106922        | 20031582        | Circulation. Cardiovascular genetics                                         | 2009        |               |
| Atorvastatin        | rs8179183        | 19023160        | Endocrine journal                                                            | 2009        | 1.952         |
| Atorvastatin        | rs854571         | 20031582        | Circulation. Cardiovascular genetics                                         | 2009        |               |
| Atorvastatin        | rs892871         | 20578904        | DNA and cell biology                                                         | 2010        | 2.159         |
| Atorvastatin        | rs9340799        | 15694942        | Atherosclerosis                                                              | 2005        | 4.086         |
| Atorvastatin        | rs9462535        | 20886236        | Human genetics                                                               | 2011        | 5.047         |
| Atorvastatin        | rs9471077        | 20886236        | Human genetics                                                               | 2011        | 5.047         |
| Atorvastatin        | rs964184         | 20339536        | PLoS one                                                                     | 2010        | 4.411         |
| Atorvastatin        | rs9644568        | 20339536        | PLoS one                                                                     | 2010        | 4.411         |
| Atorvastatin        | rs9788469        | 20031582        | Circulation. Cardiovascular genetics                                         | 2009        |               |
| Benazepril          | rs1042713        | 15554460        | Clinical and experimental hypertension (New York, N.Y. : 1993)               | 2004        | 1.142         |
| <b>Benazepril</b>   | <b>rs1799752</b> | <b>11007831</b> | <b>Nephrology, dialysis, transplantation : official publication of the I</b> | <b>2000</b> | <b>3.564</b>  |
| <b>Benazepril</b>   | <b>rs1799752</b> | <b>15788353</b> | <b>Annals of human biology</b>                                               | <b>2005</b> | <b>1.713</b>  |
| <b>Benazepril</b>   | <b>rs1799998</b> | <b>16765146</b> | <b>Clinical pharmacology and therapeutics</b>                                | <b>2006</b> | <b>6.378</b>  |
| Benazepril          | rs1801131        | 16081343        | Clinical and experimental hypertension (New York, N.Y. : 1993)               | 2005        | 1.142         |
| <b>Benazepril</b>   | <b>rs1801133</b> | <b>15226090</b> | <b>Thrombosis research</b>                                                   | <b>2004</b> | <b>2.372</b>  |
| <b>Benazepril</b>   | <b>rs1801133</b> | <b>16081343</b> | <b>Clinical and experimental hypertension (New York, N.Y. : 1993)</b>        | <b>2005</b> | <b>1.142</b>  |
| <b>Benazepril</b>   | <b>rs1801133</b> | <b>20445573</b> | <b>Journal of human hypertension</b>                                         | <b>2011</b> | <b>2.176</b>  |
| Benazepril          | rs1805087        | 15148588        | Journal of human genetics                                                    | 2004        | 2.496         |
| Benazepril          | rs1805087        | 20445573        | Journal of human hypertension                                                | 2011        | 2.176         |
| Benazepril          | rs2298668        | 20079160        | Chinese medical journal                                                      | 2009        | 0.983         |
| <b>Benazepril</b>   | <b>rs7079</b>    | <b>17261659</b> | <b>Circulation</b>                                                           | <b>2007</b> | <b>14.432</b> |
| Bepidil             | rs1065852        | 16508157        | Biological & pharmaceutical bulletin                                         | 2006        | 1.811         |
| Bisoprolol          | rs1801253        | 17217681        | Zhonghua xin xue guan bing za zhi                                            | 2006        |               |
| Bisoprolol          | rs1801253        | 17585213        | Anesthesiology                                                               | 2007        | 5.486         |
| Bumetanide          | rs1529927        | 17460608        | Clinical pharmacology and therapeutics                                       | 2007        | 6.378         |
| Bumetanide          | rs1799752        | 20877298        | The pharmacogenomics journal                                                 | 2012        | 4.306         |
| Bumetanide          | rs4961           | 20877298        | The pharmacogenomics journal                                                 | 2012        | 4.306         |
| Bumetanide          | rs5063           | 20877298        | The pharmacogenomics journal                                                 | 2012        | 4.306         |
| Bumetanide          | rs5065           | 20877298        | The pharmacogenomics journal                                                 | 2012        | 4.306         |
| Bumetanide          | rs5443           | 20877298        | The pharmacogenomics journal                                                 | 2012        | 4.306         |
| Bumetanide          | rs5723           | 17460608        | Clinical pharmacology and therapeutics                                       | 2007        | 6.378         |
| Bumetanide          | rs5729           | 17460608        | Clinical pharmacology and therapeutics                                       | 2007        | 6.378         |
| <b>Candesartan</b>  | <b>rs1799998</b> | <b>12065207</b> | <b>European journal of pharmacology</b>                                      | <b>2002</b> | <b>2.737</b>  |
| Candesartan         | rs4686799        | 19584173        | Physiological genomics                                                       | 2009        | 3.368         |
| Candesartan         | rs5030062        | 19584173        | Physiological genomics                                                       | 2009        | 3.368         |
| Candesartan         | rs5186           | 18594050        | The Annals of pharmacotherapy                                                | 2008        | 2.166         |
| Candesartan         | rs698078         | 19584173        | Physiological genomics                                                       | 2009        | 3.368         |
| Captopril           | rs1799752        | 8806248         | BMJ (Clinical research ed.)                                                  | 1996        | 13.471        |
| Captopril           | rs1799752        | 9069453         | Nephron                                                                      | 1997        |               |
| Captopril           | rs1799752        | 9551410         | Kidney international                                                         | 1998        | 6.105         |
| Captopril           | rs1799752        | 9741257         | Ugeskrift for læger                                                          | 1998        |               |
| Captopril           | rs1799752        | 9869506         | Journal of cardiovascular pharmacology                                       | 1998        | 2.406         |
| Captopril           | rs1799752        | 12832683        | Thorax                                                                       | 2003        | 6.525         |
| Captopril           | rs1799752        | 17473847        | Clinical pharmacology and therapeutics                                       | 2007        | 6.378         |
| Captopril           | rs1799752        | 19286758        | Journal of the renin-angiotensin-aldosterone system : JRAAS                  | 2009        | 1.6           |
| Captopril           | rs2106809        | 17473847        | Clinical pharmacology and therapeutics                                       | 2007        | 6.378         |
| Captopril           | rs5186           | 19286758        | Journal of the renin-angiotensin-aldosterone system : JRAAS                  | 2009        | 1.6           |
| Captopril           | rs699            | 18551010        | Journal of hypertension                                                      | 2008        | 3.98          |
| <b>Carvedilol</b>   | <b>rs1042714</b> | <b>12835612</b> | <b>Pharmacogenetics</b>                                                      | <b>2003</b> |               |
| <b>Carvedilol</b>   | <b>rs1042714</b> | <b>19034036</b> | <b>Journal of cardiovascular pharmacology</b>                                | <b>2008</b> | <b>2.406</b>  |
| <b>Carvedilol</b>   | <b>rs1042714</b> | <b>19175363</b> | <b>Basic &amp; clinical pharmacology &amp; toxicology</b>                    | <b>2009</b> | <b>2.371</b>  |

|                |                                                        |          |                                                                        |      |        |
|----------------|--------------------------------------------------------|----------|------------------------------------------------------------------------|------|--------|
| Carvedilol     | rs1042714                                              | 19422106 | Basic & clinical pharmacology & toxicology                             | 2009 | 2.371  |
| Carvedilol     | rs1042714                                              | 20352314 | Cardiovascular drugs and therapy / sponsored by the Internation        | 2010 | 3.098  |
| Carvedilol     | rs1065852                                              | 16595916 | Biological & pharmaceutical bulletin                                   | 2006 | 1.811  |
| Carvedilol     | rs1065852                                              | 16849011 | Journal of pharmacy & pharmaceutical sciences : a publication of t     | 2006 | 1.914  |
| Carvedilol     | rs1065852                                              | 17329852 | Biological & pharmaceutical bulletin                                   | 2007 | 1.811  |
| Carvedilol     | rs1065852                                              | 20643254 | The American journal of cardiology                                     | 2010 | 3.681  |
| Carvedilol     | rs16947                                                | 16595916 | Biological & pharmaceutical bulletin                                   | 2006 | 1.811  |
| Carvedilol     | rs1801253                                              | 17714089 | Clinical and experimental pharmacology & physiology                    | 2007 | 1.96   |
| Carvedilol     | rs1801253                                              | 18075464 | Pharmacogenetics and genomics                                          | 2007 | 3.865  |
| Carvedilol     | rs1801253                                              | 20643254 | The American journal of cardiology                                     | 2010 | 3.681  |
| Carvedilol     | rs1801253/rs1042714 haplotype                          | 21395649 | British journal of clinical pharmacology                               | 2011 | 3.063  |
| Carvedilol     | rs28365063/rs12233719 haplotype                        | 16849011 | Journal of pharmacy & pharmaceutical sciences : a publication of t     | 2006 | 1.914  |
| Carvedilol     | rs28365063/rs12233719 haplotype                        | 17329852 | Biological & pharmaceutical bulletin                                   | 2007 | 1.811  |
| Carvedilol     | rs35742686                                             | 20643254 | The American journal of cardiology                                     | 2010 | 3.681  |
| Carvedilol     | rs3892097                                              | 20643254 | The American journal of cardiology                                     | 2010 | 3.681  |
| Carvedilol     | rs4148323                                              | 16849011 | Journal of pharmacy & pharmaceutical sciences : a publication of t     | 2006 | 1.914  |
| Carvedilol     | rs4253778                                              | 18855529 | Pharmacogenomics                                                       | 2008 | 3.876  |
| Cerivastatin   | rs4149056                                              | 21386754 | Pharmacogenetics and genomics                                          | 2011 | 3.865  |
| Chlorthalidone | rs1799752                                              | 20577119 | Journal of hypertension                                                | 2010 | 3.98   |
| Chlorthalidone | rs2228576                                              | 20577119 | Journal of hypertension                                                | 2010 | 3.98   |
| Chlorthalidone | rs3025058                                              | 21183746 | Stroke; a journal of cerebral circulation                              | 2011 | 5.756  |
| Chlorthalidone | rs4291                                                 | 20577119 | Journal of hypertension                                                | 2010 | 3.98   |
| Chlorthalidone | rs5065                                                 | 18212314 | JAMA : the journal of the American Medical Association                 | 2008 | 30.011 |
| Clonidine      | rs1800544                                              | 19309415 | Neurogastroenterology and motility : the official journal of the Eur   | 2009 | 3.349  |
| Clonidine      | rs4795541                                              | 19309415 | Neurogastroenterology and motility : the official journal of the Eur   | 2009 | 3.349  |
| Clonidine      | rs5443                                                 | 12844135 | Clinical pharmacology and therapeutics                                 | 2003 | 6.378  |
| Clonidine      | rs5443                                                 | 19309415 | Neurogastroenterology and motility : the official journal of the Eur   | 2009 | 3.349  |
| Clonidine      | rs5443                                                 | 20833658 | Gut                                                                    | 2010 | 10.614 |
| Clonidine      | rs61767072                                             | 20833658 | Gut                                                                    | 2010 | 10.614 |
| Clopidogrel    | CYP2C19 Genotype-derived phenotype (i.e. PM, EM, etc.) | 18323861 | Clinical pharmacology and therapeutics                                 | 2008 | 6.378  |
| Clopidogrel    | CYP2C19 Genotype-derived phenotype (i.e. PM, EM, etc.) | 20801494 | Lancet                                                                 | 2010 | 33.633 |
| Clopidogrel    | CYP3A5 Genotype-derived phenotype (i.e. PM, EM, etc.)  | 16754899 | CMAJ : Canadian Medical Association journal = journal de l'Associa     | 2006 | 9.015  |
| Clopidogrel    | NR112 -14 A>T                                          | 16194864 | Platelets                                                              | 2005 | 2.117  |
| Clopidogrel    | rs1045642                                              | 17112805 | Clinical pharmacology and therapeutics                                 | 2006 | 6.378  |
| Clopidogrel    | rs1045642                                              | 19106083 | The New England journal of medicine                                    | 2009 | 53.486 |
| Clopidogrel    | rs1045642                                              | 20801494 | Lancet                                                                 | 2010 | 33.633 |
| Clopidogrel    | rs1045642                                              | 20801498 | Lancet                                                                 | 2010 | 33.633 |
| Clopidogrel    | rs1057910                                              | 17900275 | Journal of thrombosis and haemostasis : JTH                            | 2007 |        |
| Clopidogrel    | rs1062535                                              | 17157856 | Atherosclerosis                                                        | 2008 | 4.086  |
| Clopidogrel    | rs11188072/rs12248560 haplotype                        | 20801498 | Lancet                                                                 | 2010 | 33.633 |
| Clopidogrel    | rs11188072/rs12248560 haplotype                        | 21345843 | Heart (British Cardiac Society)                                        | 2011 | 4.708  |
| Clopidogrel    | rs1126643                                              | 15205592 | Blood coagulation & fibrinolysis : an international journal in haem    | 2004 | 1.408  |
| Clopidogrel    | rs1126643                                              | 16214444 | The American journal of cardiology                                     | 2005 | 3.681  |
| Clopidogrel    | rs1126643                                              | 17157856 | Atherosclerosis                                                        | 2008 | 4.086  |
| Clopidogrel    | rs12248560                                             | 19106083 | The New England journal of medicine                                    | 2009 | 53.486 |
| Clopidogrel    | rs12248560                                             | 19463375 | JACC. Cardiovascular interventions                                     | 2008 |        |
| Clopidogrel    | rs12248560                                             | 20083681 | Circulation                                                            | 2010 | 14.432 |
| Clopidogrel    | rs12248560                                             | 20492469 | Journal of thrombosis and haemostasis : JTH                            | 2010 |        |
| Clopidogrel    | rs12248560                                             | 20826260 | American heart journal                                                 | 2010 | 5.052  |
| Clopidogrel    | rs1799853                                              | 17900275 | Journal of thrombosis and haemostasis : JTH                            | 2007 |        |
| Clopidogrel    | rs2046934                                              | 18577829 | Circulation journal : official journal of the Japanese Circulation Soc | 2008 | 3.225  |
| Clopidogrel    | rs2046934                                              | 20031628 | Circulation. Cardiovascular genetics                                   | 2009 |        |
| Clopidogrel    | rs2242480                                              | 16645157 | Arteriosclerosis, thrombosis, and vascular biology                     | 2006 | 7.215  |
| Clopidogrel    | rs28371685                                             | 17900275 | Journal of thrombosis and haemostasis : JTH                            | 2007 |        |
| Clopidogrel    | rs28399504                                             | 19106083 | The New England journal of medicine                                    | 2009 | 53.486 |
| Clopidogrel    | rs28399504                                             | 19463375 | JACC. Cardiovascular interventions                                     | 2008 |        |
| Clopidogrel    | rs28399504                                             | 20801498 | Lancet                                                                 | 2010 | 33.633 |
| Clopidogrel    | rs41291556                                             | 20801498 | Lancet                                                                 | 2010 | 33.633 |
| Clopidogrel    | rs4244285                                              | 16772608 | Blood                                                                  | 2006 | 10.558 |
| Clopidogrel    | rs4244285                                              | 17697139 | Journal of thrombosis and haemostasis : JTH                            | 2007 |        |
| Clopidogrel    | rs4244285                                              | 17900275 | Journal of thrombosis and haemostasis : JTH                            | 2007 |        |
| Clopidogrel    | rs4244285                                              | 18004210 | Pharmacogenetics and genomics                                          | 2007 | 3.865  |
| Clopidogrel    | rs4244285                                              | 18323861 | Clinical pharmacology and therapeutics                                 | 2008 | 6.378  |
| Clopidogrel    | rs4244285                                              | 18346178 | Clinical and experimental pharmacology & physiology                    | 2008 | 1.96   |
| Clopidogrel    | rs4244285                                              | 18394438 | The American journal of cardiology                                     | 2008 | 3.681  |
| Clopidogrel    | rs4244285                                              | 18482659 | Journal of the American College of Cardiology                          | 2008 | 14.293 |
| Clopidogrel    | rs4244285                                              | 18532997 | Journal of thrombosis and haemostasis : JTH                            | 2008 |        |
| Clopidogrel    | rs4244285                                              | 18577829 | Circulation journal : official journal of the Japanese Circulation Sc  | 2008 | 3.225  |
| Clopidogrel    | rs4244285                                              | 19106083 | The New England journal of medicine                                    | 2009 | 53.486 |
| Clopidogrel    | rs4244285                                              | 19106084 | The New England journal of medicine                                    | 2009 | 53.486 |
| Clopidogrel    | rs4244285                                              | 19108880 | Lancet                                                                 | 2009 | 33.633 |
| Clopidogrel    | rs4244285                                              | 19193675 | European heart journal                                                 | 2009 | 10.052 |
| Clopidogrel    | rs4244285                                              | 19463375 | JACC. Cardiovascular interventions                                     | 2008 |        |
| Clopidogrel    | rs4244285                                              | 19531897 | Circulation journal : official journal of the Japanese Circulation Sc  | 2009 | 3.225  |
| Clopidogrel    | rs4244285                                              | 19624462 | Journal of thrombosis and haemostasis : JTH                            | 2009 |        |
| Clopidogrel    | rs4244285                                              | 19669737 | European journal of clinical pharmacology                              | 2009 | 3.032  |
| Clopidogrel    | rs4244285                                              | 19706858 | JAMA : the journal of the American Medical Association                 | 2009 | 30.011 |
| Clopidogrel    | rs4244285                                              | 19712984 | International journal of cardiology                                    | 2010 | 6.802  |
| Clopidogrel    | rs4244285                                              | 20040040 | Journal of thrombosis and haemostasis : JTH                            | 2010 |        |
| Clopidogrel    | rs4244285                                              | 20351750 | The pharmacogenomics journal                                           | 2011 | 4.306  |
| Clopidogrel    | rs4244285                                              | 20492469 | Journal of thrombosis and haemostasis : JTH                            | 2010 |        |
| Clopidogrel    | rs4244285                                              | 20510210 | Journal of the American College of Cardiology                          | 2010 | 14.293 |

|             |               |          |                                                                            |      |        |
|-------------|---------------|----------|----------------------------------------------------------------------------|------|--------|
| Clopidogrel | rs4244285     | 20650435 | JACC. Cardiovascular interventions                                         | 2010 |        |
| Clopidogrel | rs4244285     | 20708365 | Journal of the American College of Cardiology                              | 2010 | 14.293 |
| Clopidogrel | rs4244285     | 20724801 | Journal of atherosclerosis and thrombosis                                  | 2010 | 2.293  |
| Clopidogrel | rs4244285     | 20801498 | Lancet                                                                     | 2010 | 33.633 |
| Clopidogrel | rs4244285     | 20845077 | Molecular biology reports                                                  | 2011 | 1.875  |
| Clopidogrel | rs4244285     | 20924183 | Cardiology                                                                 | 2010 | 1.982  |
| Clopidogrel | rs4244285     | 21099121 | Circulation journal : official journal of the Japanese Circulation Society | 2011 | 3.225  |
| Clopidogrel | rs4244285     | 21163112 | Chinese medical journal                                                    | 2010 | 0.983  |
| Clopidogrel | rs4244285     | 21168310 | Journal of cardiology                                                      | 2011 | 1.175  |
| Clopidogrel | rs4244285     | 21178986 | Clinical pharmacology and therapeutics                                     | 2011 | 6.378  |
| Clopidogrel | rs4244285     | 21345843 | Heart (British Cardiac Society)                                            | 2011 | 4.708  |
| Clopidogrel | rs4244285     | 21426546 | Thrombosis journal                                                         | 2011 |        |
| Clopidogrel | rs4244285     | 21474982 | The Korean journal of laboratory medicine                                  | 2011 | 0.66   |
| Clopidogrel | rs4244285     | 21511217 | JACC. Cardiovascular interventions                                         | 2011 |        |
| Clopidogrel | rs4244285     | 21527445 | European heart journal                                                     | 2011 | 10.052 |
| Clopidogrel | rs4244285     | 21628721 | Heart (British Cardiac Society)                                            | 2011 | 4.708  |
| Clopidogrel | rs4244285     | 21700758 | Heart (British Cardiac Society)                                            | 2012 | 4.708  |
| Clopidogrel | rs4244285     | 21786436 | Yonsei medical journal                                                     | 2011 | 1.02   |
| Clopidogrel | rs4986893     | 18323861 | Clinical pharmacology and therapeutics                                     | 2008 | 6.378  |
| Clopidogrel | rs4986893     | 18346178 | Clinical and experimental pharmacology & physiology                        | 2008 | 1.96   |
| Clopidogrel | rs4986893     | 18532997 | Journal of thrombosis and haemostasis : JTH                                | 2008 |        |
| Clopidogrel | rs4986893     | 19106083 | The New England journal of medicine                                        | 2009 | 53.486 |
| Clopidogrel | rs4986893     | 19531897 | Circulation journal : official journal of the Japanese Circulation Society | 2009 | 3.225  |
| Clopidogrel | rs4986893     | 19576320 | The American journal of cardiology                                         | 2009 | 3.681  |
| Clopidogrel | rs4986893     | 20650435 | JACC. Cardiovascular interventions                                         | 2010 |        |
| Clopidogrel | rs4986893     | 20724801 | Journal of atherosclerosis and thrombosis                                  | 2010 | 2.293  |
| Clopidogrel | rs4986893     | 20801498 | Lancet                                                                     | 2010 | 33.633 |
| Clopidogrel | rs4986893     | 21168310 | Journal of cardiology                                                      | 2011 | 1.175  |
| Clopidogrel | rs4986893     | 21178986 | Clinical pharmacology and therapeutics                                     | 2011 | 6.378  |
| Clopidogrel | rs4986893     | 21345843 | Heart (British Cardiac Society)                                            | 2011 | 4.708  |
| Clopidogrel | rs4986893     | 21474982 | The Korean journal of laboratory medicine                                  | 2011 | 0.66   |
| Clopidogrel | rs4986893     | 21511217 | JACC. Cardiovascular interventions                                         | 2011 |        |
| Clopidogrel | rs4986893     | 21786436 | Yonsei medical journal                                                     | 2011 | 1.02   |
| Clopidogrel | rs56337013    | 20801498 | Lancet                                                                     | 2010 | 33.633 |
| Clopidogrel | rs5918        | 15166949 | Blood coagulation & fibrinolysis : an international journal in haemostasis | 2004 | 1.408  |
| Clopidogrel | rs5918        | 19530321 | Blood coagulation & fibrinolysis : an international journal in haemostasis | 2009 | 1.408  |
| Clopidogrel | rs6136        | 15968882 | International journal of clinical pharmacology and therapeutics            | 2005 | 1.189  |
| Clopidogrel | rs6785930     | 15933261 | Stroke; a journal of cerebral circulation                                  | 2005 | 5.756  |
| Clopidogrel | rs6787801     | 20031628 | Circulation. Cardiovascular genetics                                       | 2009 |        |
| Clopidogrel | rs6798347     | 20031628 | Circulation. Cardiovascular genetics                                       | 2009 |        |
| Clopidogrel | rs6801273     | 20031628 | Circulation. Cardiovascular genetics                                       | 2009 |        |
| Clopidogrel | rs6809699     | 18485500 | International journal of cardiology                                        | 2009 | 6.802  |
| Clopidogrel | rs72552267    | 20801498 | Lancet                                                                     | 2010 | 33.633 |
| Clopidogrel | rs72558186    | 20801498 | Lancet                                                                     | 2010 | 33.633 |
| Clopidogrel | rs762551      | 21148426 | Arteriosclerosis, thrombosis, and vascular biology                         | 2011 | 7.215  |
| Clopidogrel | rs9848789     | 20031628 | Circulation. Cardiovascular genetics                                       | 2009 |        |
| Clopidogrel | rs9859552     | 20031628 | Circulation. Cardiovascular genetics                                       | 2009 |        |
| Dabigatran  | rs2244613     | 23467860 | Circulation                                                                | 2013 | 14.432 |
| Digoxin     | rs1045642     | 11697464 | Pharmaceutical research                                                    | 2001 | 4.456  |
| Digoxin     | rs1045642     | 12189368 | Clinical pharmacology and therapeutics                                     | 2002 | 6.378  |
| Digoxin     | rs1045642     | 12425480 | Pharmaceutical research                                                    | 2002 | 4.456  |
| Digoxin     | rs1045642     | 17404720 | European journal of clinical pharmacology                                  | 2007 | 3.032  |
| Digoxin     | rs1045642     | 18334914 | Pharmacogenetics and genomics                                              | 2008 | 3.865  |
| Digoxin     | rs1045642     | 18810246 | Pharmacology                                                               | 2008 | 1.802  |
| Digoxin     | rs1045642     | 21311904 | International journal of legal medicine                                    | 2011 | 2.939  |
| Digoxin     | rs1128503     | 18334914 | Pharmacogenetics and genomics                                              | 2008 | 3.865  |
| Digoxin     | rs1128503     | 18810246 | Pharmacology                                                               | 2008 | 1.802  |
| Digoxin     | rs1128503     | 21311904 | International journal of legal medicine                                    | 2011 | 2.939  |
| Digoxin     | rs2032582     | 12189368 | Clinical pharmacology and therapeutics                                     | 2002 | 6.378  |
| Digoxin     | rs2032582     | 12425480 | Pharmaceutical research                                                    | 2002 | 4.456  |
| Digoxin     | rs2032582     | 17652833 | Pharmacological reports : PR                                               | 2007 | 2.5    |
| Digoxin     | rs2032582     | 18334914 | Pharmacogenetics and genomics                                              | 2008 | 3.865  |
| Digoxin     | rs2032582     | 18810246 | Pharmacology                                                               | 2008 | 1.802  |
| Digoxin     | rs2032582     | 21311904 | International journal of legal medicine                                    | 2011 | 2.939  |
| Dobutamine  | rs1801253     | 15564877 | Pharmacogenetics                                                           | 2004 |        |
| Dobutamine  | rs7121        | 19542315 | Journal of clinical pharmacology                                           | 2009 | 3.59   |
| Dofetilide  | rs36210421    | 15522280 | Journal of molecular and cellular cardiology                               | 2004 | 5.499  |
| Doxazosin   | rs5065        | 18212314 | JAMA : the journal of the American Medical Association                     | 2008 | 30.011 |
| Dronedarone | CYP2D6*5      | 14748763 | Fundamental & clinical pharmacology                                        | 2004 | 2.152  |
| Dronedarone | rs35742686    | 14748763 | Fundamental & clinical pharmacology                                        | 2004 | 2.152  |
| Dronedarone | rs3892097     | 14748763 | Fundamental & clinical pharmacology                                        | 2004 | 2.152  |
| Dronedarone | rs5030655     | 14748763 | Fundamental & clinical pharmacology                                        | 2004 | 2.152  |
| Enalapril   | BDKRB2 534G>A | 18180402 | Hypertension                                                               | 2008 | 6.908  |
| Enalapril   | rs1042714     | 17178264 | Clinical pharmacology and therapeutics                                     | 2006 | 6.378  |
| Enalapril   | rs1799752     | 8986921  | Journal of hypertension                                                    | 1996 | 3.98   |
| Enalapril   | rs1799752     | 9661139  | Kidney & blood pressure research                                           | 1998 | 1.5    |
| Enalapril   | rs1799752     | 10880412 | Circulation                                                                | 2000 | 14.432 |
| Enalapril   | rs1799752     | 15523323 | American heart journal                                                     | 2004 | 5.052  |
| Enalapril   | rs1799752     | 16020596 | Heart (British Cardiac Society)                                            | 2005 | 4.708  |
| Enalapril   | rs1799752     | 17163356 | Hormone and metabolic research = Hormon- und Stoffwechselforschung         | 2006 | 2.414  |
| Enalapril   | rs1799752     | 17222813 | Clinical biochemistry                                                      | 2007 | 2.043  |
| Enalapril   | rs1799752     | 17524880 | Transplantation proceedings                                                | 2007 | 0.993  |

|                            |                                           |                 |                                                                      |             |               |
|----------------------------|-------------------------------------------|-----------------|----------------------------------------------------------------------|-------------|---------------|
| Enalapril                  | rs1800795                                 | 15342284        | The American journal of cardiology                                   | 2004        | 3.681         |
| Enalapril                  | rs699                                     | 12911327        | Clinical science (London, England : 1979)                            | 2003        | 4.613         |
| Enalapril                  | rs699                                     | 18175066        | Clinical and experimental nephrology                                 | 2008        | 1.46          |
| <b>Felodipine</b>          | <b>rs2238032</b>                          | <b>16610939</b> | <b>Pharmacogenomics</b>                                              | <b>2006</b> | <b>3.876</b>  |
| <b>Felodipine</b>          | <b>rs2239050</b>                          | <b>16610939</b> | <b>Pharmacogenomics</b>                                              | <b>2006</b> | <b>3.876</b>  |
| <b>Felodipine</b>          | <b>rs2239128</b>                          | <b>16610939</b> | <b>Pharmacogenomics</b>                                              | <b>2006</b> | <b>3.876</b>  |
| Fenofibrate                | LPL Pro207Leu                             | 12042669        | Pharmacogenetics                                                     | 2002        |               |
| Fenofibrate                | rs1417938                                 | 18285551        | Diabetes care                                                        | 2008        | 7.141         |
| Fenofibrate                | rs1799752                                 | 16779534        | Cardiovascular drugs and therapy / sponsored by the International    | 2006        | 3.098         |
| Fenofibrate                | rs1800206                                 | 12042669        | Pharmacogenetics                                                     | 2002        |               |
| Fenofibrate                | rs1800795                                 | 16607077        | Blood coagulation & fibrinolysis : an international journal in haemk | 2006        | 1.408         |
| Fenofibrate                | rs2230806                                 | 20346718        | Molecular genetics and metabolism                                    | 2010        | 3.539         |
| Fenofibrate                | rs2230808                                 | 20346718        | Molecular genetics and metabolism                                    | 2010        | 3.539         |
| Fenofibrate                | rs2241883                                 | 15249972        | Journal of human genetics                                            | 2004        | 2.496         |
| <b>Fenofibrate</b>         | <b>rs2727786</b>                          | <b>19207029</b> | <b>Pharmacogenomics</b>                                              | <b>2009</b> | <b>3.876</b>  |
| Fenofibrate                | rs2854117                                 | 19057464        | Pharmacogenetics and genomics                                        | 2009        | 3.865         |
| Fenofibrate                | rs3091244                                 | 18285551        | Diabetes care                                                        | 2008        | 7.141         |
| Fenofibrate                | rs3135506                                 | 17431185        | Arteriosclerosis, thrombosis, and vascular biology                   | 2007        | 7.215         |
| Fenofibrate                | rs3135506                                 | 19056598        | The American journal of clinical nutrition                           | 2009        | 6.606         |
| Fenofibrate                | rs3135506                                 | 19057464        | Pharmacogenetics and genomics                                        | 2009        | 3.865         |
| <b>Fenofibrate</b>         | <b>rs320</b>                              | <b>19207029</b> | <b>Pharmacogenomics</b>                                              | <b>2009</b> | <b>3.876</b>  |
| Fenofibrate                | rs4238001                                 | 18542840        | Journal of human genetics                                            | 2008        | 2.496         |
| Fenofibrate                | rs4253778                                 | 15608561        | Pharmacogenetics                                                     | 2004        |               |
| Fenofibrate                | rs429358/rs7412 haplotype                 | 12042669        | Pharmacogenetics                                                     | 2002        |               |
| Fenofibrate                | rs429358/rs7412 haplotype                 | 17056835        | Journal of cardiovascular pharmacology and therapeutics              | 2006        | 1.969         |
| Fenofibrate                | rs429358/rs7412 haplotype                 | 20729559        | Circulation. Cardiovascular genetics                                 | 2010        |               |
| Fenofibrate                | rs4520                                    | 19057464        | Pharmacogenetics and genomics                                        | 2009        | 3.865         |
| Fenofibrate                | rs5104                                    | 19057464        | Pharmacogenetics and genomics                                        | 2009        | 3.865         |
| Fenofibrate                | rs5128                                    | 19057464        | Pharmacogenetics and genomics                                        | 2009        | 3.865         |
| Fenofibrate                | rs662799                                  | 19056598        | The American journal of clinical nutrition                           | 2009        | 6.606         |
| Fenofibrate                | rs662799                                  | 19344899        | Atherosclerosis                                                      | 2009        | 4.086         |
| <b>Fenofibrate</b>         | <b>rs676210</b>                           | <b>20724655</b> | <b>Journal of lipid research</b>                                     | <b>2010</b> | <b>6.115</b>  |
| Fenofibrate                | rs780094                                  | 19056598        | The American journal of clinical nutrition                           | 2009        | 6.606         |
| Flecainide                 | rs1065852                                 | 18754843        | British journal of clinical pharmacology                             | 2008        | 3.063         |
| Fluvastatin                | ABC81 IVS+17T>A                           | 16002074        | Atherosclerosis                                                      | 2006        | 4.086         |
| Fluvastatin                | rs1057910                                 | 12891229        | Clinical pharmacology and therapeutics                               | 2003        | 6.378         |
| <b>Fluvastatin</b>         | <b>rs11045819</b>                         | <b>18781850</b> | <b>Pharmacogenomics</b>                                              | <b>2008</b> | <b>3.876</b>  |
| <b>Fluvastatin</b>         | <b>rs1799752</b>                          | <b>10636265</b> | <b>Journal of the American College of Cardiology</b>                 | <b>2000</b> | <b>14.293</b> |
| Fluvastatin                | rs2032582                                 | 16103896        | The pharmacogenomics journal                                         | 2005        | 4.306         |
| Fluvastatin                | rs2231142                                 | 19842935        | Pharmacogenomics                                                     | 2009        | 3.876         |
| Fluvastatin                | rs2422493                                 | 11349008        | Circulation research                                                 | 2001        | 9.504         |
| Fluvastatin                | rs3892097                                 | 17289397        | Pharmacological research : the official journal of the Italian Pharm | 2007        | 3.612         |
| Fluvastatin                | rs429358/rs7412 haplotype                 | 16103896        | The pharmacogenomics journal                                         | 2005        | 4.306         |
| Fluvastatin                | rs429358/rs7412 haplotype                 | 17289397        | Pharmacological research : the official journal of the Italian Pharm | 2007        | 3.612         |
| Fluvastatin                | rs4783961                                 | 16002074        | Atherosclerosis                                                      | 2006        | 4.086         |
| Fluvastatin                | rs5443                                    | 18551043        | Pharmacogenetics and genomics                                        | 2008        | 3.865         |
| Fluvastatin                | rs60282872                                | 12436350        | Journal of molecular medicine (Berlin, Germany)                      | 2002        | 5.192         |
| furosemide                 | rs1529927                                 | 17460608        | Clinical pharmacology and therapeutics                               | 2007        | 6.378         |
| furosemide                 | rs1799752                                 | 20877298        | The pharmacogenomics journal                                         | 2012        | 4.306         |
| furosemide                 | rs4961                                    | 20877298        | The pharmacogenomics journal                                         | 2012        | 4.306         |
| furosemide                 | rs5063                                    | 20877298        | The pharmacogenomics journal                                         | 2012        | 4.306         |
| furosemide                 | rs5065                                    | 20877298        | The pharmacogenomics journal                                         | 2012        | 4.306         |
| furosemide                 | rs5443                                    | 20877298        | The pharmacogenomics journal                                         | 2012        | 4.306         |
| furosemide                 | rs5723                                    | 17460608        | Clinical pharmacology and therapeutics                               | 2007        | 6.378         |
| furosemide                 | rs5729                                    | 17460608        | Clinical pharmacology and therapeutics                               | 2007        | 6.378         |
| Hydralazine                | C4A*0 (null)                              | 2565418         | Lancet                                                               | 1989        | 33.633        |
| Hydralazine                | HLA-DR                                    | 2565418         | Lancet                                                               | 1989        | 33.633        |
| <b>Hydralazine</b>         | <b>rs1799983</b>                          | <b>19327620</b> | <b>Journal of cardiac failure</b>                                    | <b>2009</b> | <b>3.362</b>  |
| <b>Hydralazine</b>         | <b>rs1799998</b>                          | <b>16979018</b> | <b>Journal of the American College of Cardiology</b>                 | <b>2006</b> | <b>14.293</b> |
| Hydralazine                | rs3918242                                 | 21769110        | The pharmacogenomics journal                                         | 2011        | 4.306         |
| Hydrochlorothiazide        | HSD11B2 CA repeat microsatellite intron 1 | 15673310        | Kidney international                                                 | 2005        | 6.105         |
| Hydrochlorothiazide        | rs10792367                                | 21164499        | American journal of hypertension                                     | 2011        | 3.129         |
| <b>Hydrochlorothiazide</b> | <b>rs11240688</b>                         | <b>21261619</b> | <b>European journal of clinical investigation</b>                    | <b>2011</b> | <b>2.736</b>  |
| Hydrochlorothiazide        | rs1159744                                 | 16172412        | Hypertension                                                         | 2005        | 6.908         |
| Hydrochlorothiazide        | rs1799752                                 | 12371972        | Kidney international                                                 | 2002        | 6.105         |
| Hydrochlorothiazide        | rs1799752                                 | 12623934        | Hypertension                                                         | 2003        | 6.908         |
| Hydrochlorothiazide        | rs1799752                                 | 12799093        | American journal of hypertension                                     | 2003        | 3.129         |
| Hydrochlorothiazide        | rs1799752                                 | 16080804        | Zhonghua xin xue guan bing za zhi                                    | 2005        |               |
| Hydrochlorothiazide        | rs1799752                                 | 16450155        | European journal of clinical pharmacology                            | 2006        | 3.032         |
| Hydrochlorothiazide        | rs1799752                                 | 17531119        | Chinese medical journal                                              | 2007        | 0.983         |
| Hydrochlorothiazide        | rs1799752                                 | 18188985        | Biomedical and environmental sciences : BES                          | 2007        | 1.063         |
| Hydrochlorothiazide        | rs1799752                                 | 21269061        | Clinical and experimental hypertension (New York, N.Y. : 1993)       | 2011        | 1.142         |
| Hydrochlorothiazide        | rs1799983                                 | 14553962        | American journal of hypertension                                     | 2003        | 3.129         |
| Hydrochlorothiazide        | rs1799983                                 | 15864129        | Pharmacogenetics and genomics                                        | 2005        | 3.865         |
| Hydrochlorothiazide        | rs1799998                                 | 17531119        | Chinese medical journal                                              | 2007        | 0.983         |
| Hydrochlorothiazide        | rs1894111                                 | 21127457        | Pharmacogenetics and genomics                                        | 2011        | 3.865         |
| Hydrochlorothiazide        | rs2106809                                 | 17473847        | Clinical pharmacology and therapeutics                               | 2007        | 6.378         |
| Hydrochlorothiazide        | rs2107614                                 | 16172412        | Hypertension                                                         | 2005        | 6.908         |
| Hydrochlorothiazide        | rs2277869                                 | 16172412        | Hypertension                                                         | 2005        | 6.908         |
| Hydrochlorothiazide        | rs2400707                                 | 16172412        | Hypertension                                                         | 2005        | 6.908         |
| Hydrochlorothiazide        | rs315135/rs317689/rs7297610 haplotype     | 18591461        | Hypertension                                                         | 2008        | 6.908         |
| Hydrochlorothiazide        | rs4149601                                 | 18591455        | Hypertension                                                         | 2008        | 6.908         |



|                            |                                                                                 |                 |                                                                                                                       |             |               |
|----------------------------|---------------------------------------------------------------------------------|-----------------|-----------------------------------------------------------------------------------------------------------------------|-------------|---------------|
| Hydrochlorothiazide        | rs4686799                                                                       | 19584173        | Physiological genomics                                                                                                | 2009        | 3.368         |
| <b>Hydrochlorothiazide</b> | <b>rs4961</b>                                                                   | <b>9149697</b>  | <b>Lancet</b>                                                                                                         | <b>1997</b> | <b>33.633</b> |
| <b>Hydrochlorothiazide</b> | <b>rs4961</b>                                                                   | <b>12623934</b> | <b>Hypertension</b>                                                                                                   | <b>2003</b> | <b>6.908</b>  |
| <b>Hydrochlorothiazide</b> | <b>rs4961</b>                                                                   | <b>16450155</b> | <b>European journal of clinical pharmacology</b>                                                                      | <b>2006</b> | <b>3.032</b>  |
| <b>Hydrochlorothiazide</b> | <b>rs4961</b>                                                                   | <b>18591455</b> | <b>Hypertension</b>                                                                                                   | <b>2008</b> | <b>6.908</b>  |
| Hydrochlorothiazide        | rs5030062                                                                       | 19584173        | Physiological genomics                                                                                                | 2009        | 3.368         |
| Hydrochlorothiazide        | rs5051                                                                          | 17531119        | Chinese medical journal                                                                                               | 2007        | 0.983         |
| Hydrochlorothiazide        | rs5063                                                                          | 19141362        | International journal of cardiology                                                                                   | 2010        | 6.802         |
| Hydrochlorothiazide        | rs5065                                                                          | 19141362        | International journal of cardiology                                                                                   | 2010        | 6.802         |
| Hydrochlorothiazide        | rs5443                                                                          | 11230366        | Hypertension                                                                                                          | 2001        | 6.908         |
| Hydrochlorothiazide        | rs5723                                                                          | 16172412        | Hypertension                                                                                                          | 2005        | 6.908         |
| Hydrochlorothiazide        | rs5723/rs5729                                                                   | 15864129        | Pharmacogenetics and genomics                                                                                         | 2005        | 3.865         |
| Hydrochlorothiazide        | rs5729                                                                          | 16172412        | Hypertension                                                                                                          | 2005        | 6.908         |
| Hydrochlorothiazide        | rs698078                                                                        | 19584173        | Physiological genomics                                                                                                | 2009        | 3.368         |
| Hydrochlorothiazide        | rs880054                                                                        | 18591455        | Hypertension                                                                                                          | 2008        | 6.908         |
| Irbesartan                 | AGTR1 5245C>T                                                                   | 18464745        | American journal of hypertension                                                                                      | 2008        | 3.129         |
| Irbesartan                 | BDKRB2 + and - alleles (presence/absence of a 21 to 29 nonanucleotide sequence) | 12640257        | Journal of hypertension                                                                                               | 2003        | 3.98          |
| Irbesartan                 | CYP11B2 1016T>C                                                                 | 18773126        | Methods and findings in experimental and clinical pharmacology                                                        | 2008        | 1.037         |
| Irbesartan                 | rs1048101                                                                       | 16153395        | Clinical pharmacology and therapeutics                                                                                | 2005        | 6.378         |
| Irbesartan                 | rs1057910                                                                       | 16094537        | European journal of clinical pharmacology                                                                             | 2005        | 3.032         |
| Irbesartan                 | rs1057910                                                                       | 16541193        | Methods and findings in experimental and clinical pharmacology                                                        | 2006        | 1.037         |
| <b>Irbesartan</b>          | <b>rs1367117</b>                                                                | <b>15453913</b> | <b>BMC cardiovascular disorders</b>                                                                                   | <b>2010</b> | <b>2.021</b>  |
| Irbesartan                 | rs1403543                                                                       | 20844184        | Nephrology, dialysis, transplantation : official publication of the European Society for Dialysis and Transplantation | 2004        | 3.564         |
| Irbesartan                 | rs1492097                                                                       | 21346624        | Journal of hypertension                                                                                               | 2011        | 3.98          |
| <b>Irbesartan</b>          | <b>rs1799752</b>                                                                | <b>11593098</b> | <b>Journal of hypertension</b>                                                                                        | <b>2001</b> | <b>3.98</b>   |
| Irbesartan                 | rs1799998                                                                       | 12022239        | American journal of hypertension                                                                                      | 2002        | 3.129         |
| Irbesartan                 | rs1799998                                                                       | 18773126        | Methods and findings in experimental and clinical pharmacology                                                        | 2008        | 1.037         |
| Irbesartan                 | rs1800471                                                                       | 15049387        | Clinical cardiology                                                                                                   | 2004        | 1.807         |
| Irbesartan                 | rs1801701                                                                       | 15614026        | Journal of hypertension                                                                                               | 2004        | 3.98          |
| Irbesartan                 | rs2640539                                                                       | 21346624        | Journal of hypertension                                                                                               | 2011        | 3.98          |
| Irbesartan                 | rs30187                                                                         | 13678427        | BMC cardiovascular disorders                                                                                          | 2003        | 2.021         |
| Irbesartan                 | rs388915                                                                        | 21346624        | Journal of hypertension                                                                                               | 2011        | 3.98          |
| Irbesartan                 | rs4762                                                                          | 11910301        | Journal of hypertension                                                                                               | 2002        | 3.98          |
| Irbesartan                 | rs5063                                                                          | 16368448        | Clinical therapeutics                                                                                                 | 2005        | 2.551         |
| Irbesartan                 | rs5186                                                                          | 11910301        | Journal of hypertension                                                                                               | 2002        | 3.98          |
| Irbesartan                 | rs5186                                                                          | 21346624        | Journal of hypertension                                                                                               | 2011        | 3.98          |
| Irbesartan                 | rs5370                                                                          | 15188945        | Clinical cardiology                                                                                                   | 2004        | 1.807         |
| Irbesartan                 | rs699                                                                           | 11910301        | Journal of hypertension                                                                                               | 2002        | 3.98          |
| Irbesartan                 | rs699                                                                           | 15614026        | Journal of hypertension                                                                                               | 2004        | 3.98          |
| Isoprenaline               | rs1042713                                                                       | 11586955        | The New England journal of medicine                                                                                   | 2001        | 53.486        |
| Isoprenaline               | rs17098707                                                                      | 18425130        | Nature medicine                                                                                                       | 2008        | 25.43         |
| Lisinopril                 | rs1799752                                                                       | 9726242         | Diabetes                                                                                                              | 1998        | 8.889         |
| Lisinopril                 | rs1799752                                                                       | 20577119        | Journal of hypertension                                                                                               | 2010        | 3.98          |
| Lisinopril                 | rs2228576                                                                       | 20577119        | Journal of hypertension                                                                                               | 2010        | 3.98          |
| Lisinopril                 | rs3025058                                                                       | 21183746        | Stroke; a journal of cerebral circulation                                                                             | 2011        | 5.756         |
| Lisinopril                 | rs4291                                                                          | 20577119        | Journal of hypertension                                                                                               | 2010        | 3.98          |
| Lisinopril                 | rs4961                                                                          | 16702981        | The pharmacogenomics journal                                                                                          | 2007        | 4.306         |
| Lisinopril                 | rs5065                                                                          | 18212314        | JAMA : the journal of the American Medical Association                                                                | 2008        | 30.011        |
| Losartan                   | CYP2C9*30                                                                       | 18971529        | Hypertension research : official journal of the Japanese Society of Hypertension                                      | 2008        | 2.353         |
| Losartan                   | rs1057910                                                                       | 11408373        | Drug metabolism and disposition: the biological fate of chemicals                                                     | 2001        | 3.716         |
| Losartan                   | rs1057910                                                                       | 11823761        | Clinical pharmacology and therapeutics                                                                                | 2002        | 6.378         |
| Losartan                   | rs1057910                                                                       | 15197523        | European journal of clinical pharmacology                                                                             | 2004        | 3.032         |
| Losartan                   | rs1057910                                                                       | 18971529        | Hypertension research : official journal of the Japanese Society of Hypertension                                      | 2008        | 2.353         |
| Losartan                   | rs1057910                                                                       | 19669737        | European journal of clinical pharmacology                                                                             | 2009        | 3.032         |
| Losartan                   | rs12750834                                                                      | 17562974        | Hypertension                                                                                                          | 2007        | 6.908         |
| Losartan                   | rs1799752                                                                       | 10710136        | Journal of cardiovascular pharmacology                                                                                | 2000        | 2.406         |
| Losartan                   | rs1799752                                                                       | 11208681        | Circulation                                                                                                           | 2001        | 14.432        |
| Losartan                   | rs1799752                                                                       | 16020596        | Heart (British Cardiac Society)                                                                                       | 2005        | 4.708         |
| Losartan                   | rs1799752                                                                       | 16312263        | Clinical nephrology                                                                                                   | 2005        | 1.058         |
| Losartan                   | rs1799752                                                                       | 17222813        | Clinical biochemistry                                                                                                 | 2007        | 2.043         |
| Losartan                   | rs1799752                                                                       | 17524880        | Transplantation proceedings                                                                                           | 2007        | 0.993         |
| Losartan                   | rs1799752                                                                       | 19319668        | Genomic medicine                                                                                                      | 2008        |               |
| Losartan                   | rs1799752                                                                       | 20830509        | Molecular and cellular biochemistry                                                                                   | 2011        | 2.168         |
| Losartan                   | rs1799853                                                                       | 15197523        | European journal of clinical pharmacology                                                                             | 2004        | 3.032         |
| Losartan                   | rs1800795                                                                       | 15342284        | The American journal of cardiology                                                                                    | 2004        | 3.681         |
| Losartan                   | rs28371686                                                                      | 15289788        | Clinical pharmacology and therapeutics                                                                                | 2004        | 6.378         |
| Losartan                   | rs5186                                                                          | 10594793        | Kidney international                                                                                                  | 1999        | 6.105         |
| Losartan                   | rs5186                                                                          | 15743363        | The American journal of gastroenterology                                                                              | 2005        | 6.882         |
| Losartan                   | rs5186                                                                          | 15775779        | Journal of hypertension                                                                                               | 2005        | 3.98          |
| Losartan                   | rs5186                                                                          | 16279926        | The American journal of gastroenterology                                                                              | 2005        | 6.882         |
| Losartan                   | rs699                                                                           | 18175066        | Clinical and experimental nephrology                                                                                  | 2008        | 1.46          |
| Losartan                   | rs72558184                                                                      | 18971529        | Hypertension research : official journal of the Japanese Society of Hypertension                                      | 2008        | 2.353         |
| Losartan                   | rs72558187                                                                      | 18971529        | Hypertension research : official journal of the Japanese Society of Hypertension                                      | 2008        | 2.353         |
| Losartan                   | rs72558189                                                                      | 18971529        | Hypertension research : official journal of the Japanese Society of Hypertension                                      | 2008        | 2.353         |
| Losartan                   | rs9332131                                                                       | 15289788        | Clinical pharmacology and therapeutics                                                                                | 2004        | 6.378         |
| Lovastatin                 | rs1059507                                                                       | 16755277        | The pharmacogenomics journal                                                                                          | 2007        | 4.306         |
| Lovastatin                 | rs1059611                                                                       | 16755277        | The pharmacogenomics journal                                                                                          | 2007        | 4.306         |
| Lovastatin                 | rs10645926                                                                      | 16755277        | The pharmacogenomics journal                                                                                          | 2007        | 4.306         |
| Lovastatin                 | rs11570891                                                                      | 16755277        | The pharmacogenomics journal                                                                                          | 2007        | 4.306         |
| Lovastatin                 | rs15285                                                                         | 16755277        | The pharmacogenomics journal                                                                                          | 2007        | 4.306         |
| Lovastatin                 | rs1800588                                                                       | 11171785        | Circulation                                                                                                           | 2001        | 14.432        |
| Lovastatin                 | rs1803924                                                                       | 16755277        | The pharmacogenomics journal                                                                                          | 2007        | 4.306         |

|                    |                                                          |                 |                                                                              |             |              |
|--------------------|----------------------------------------------------------|-----------------|------------------------------------------------------------------------------|-------------|--------------|
| Lovastatin         | rs320                                                    | 16755277        | The pharmacogenomics journal                                                 | 2007        | 4.306        |
| Lovastatin         | rs3200218                                                | 16755277        | The pharmacogenomics journal                                                 | 2007        | 4.306        |
| Lovastatin         | rs328                                                    | 16755277        | The pharmacogenomics journal                                                 | 2007        | 4.306        |
| Lovastatin         | rs3289                                                   | 16755277        | The pharmacogenomics journal                                                 | 2007        | 4.306        |
| Lovastatin         | rs3735964                                                | 16755277        | The pharmacogenomics journal                                                 | 2007        | 4.306        |
| Lovastatin         | rs3866471                                                | 16755277        | The pharmacogenomics journal                                                 | 2007        | 4.306        |
| Lovastatin         | rs429358/rs7412 haplotype                                | 8345800         | Metabolism: clinical and experimental                                        | 1993        | 2.538        |
| Lovastatin         | rs662799                                                 | 19530961        | Pharmacogenomics                                                             | 2009        | 3.876        |
| Lovastatin         | rs776746                                                 | 15284534        | Pharmacogenetics                                                             | 2004        |              |
| Methyl dopa        | rs3918242                                                | 21769110        | The pharmacogenomics journal                                                 | 2011        | 4.306        |
| Metoprolol         | CYP2D6 Genotype-derived phenotype (i.e. PM, EM, etc.)    | 12386645        | Clinical pharmacology and therapeutics                                       | 2002        | 6.378        |
| Metoprolol         | CYP2D6 Genotype-derived phenotype (i.e. PM, EM, etc.)    | 19037197        | Clinical pharmacology and therapeutics                                       | 2009        | 6.378        |
| <b>Metoprolol</b>  | <b>CYP2D6*5</b>                                          | <b>15592325</b> | <b>Clinical pharmacology and therapeutics</b>                                | <b>2004</b> | <b>6.378</b> |
| <b>Metoprolol</b>  | <b>rs1024323</b>                                         | <b>19119263</b> | <b>American journal of hypertension</b>                                      | <b>2009</b> | <b>3.129</b> |
| Metoprolol         | rs1042714                                                | 16027735        | The pharmacogenomics journal                                                 | 2005        | 4.306        |
| Metoprolol         | rs1042714                                                | 17671401        | Pharmacology                                                                 | 2007        | 1.802        |
| <b>Metoprolol</b>  | <b>rs1065852</b>                                         | <b>15467211</b> | <b>Biological &amp; pharmaceutical bulletin</b>                              | <b>2004</b> | <b>1.811</b> |
| <b>Metoprolol</b>  | <b>rs1065852</b>                                         | <b>15592325</b> | <b>Clinical pharmacology and therapeutics</b>                                | <b>2004</b> | <b>6.378</b> |
| <b>Metoprolol</b>  | <b>rs1065852</b>                                         | <b>18834373</b> | <b>Journal of clinical pharmacy and therapeutics</b>                         | <b>2008</b> | <b>1.649</b> |
| <b>Metoprolol</b>  | <b>rs16947</b>                                           | <b>15467211</b> | <b>Biological &amp; pharmaceutical bulletin</b>                              | <b>2004</b> | <b>1.811</b> |
| <b>Metoprolol</b>  | <b>rs16947</b>                                           | <b>15592325</b> | <b>Clinical pharmacology and therapeutics</b>                                | <b>2004</b> | <b>6.378</b> |
| <b>Metoprolol</b>  | <b>rs16947/rs28371706 haplotype</b>                      | <b>15592325</b> | <b>Clinical pharmacology and therapeutics</b>                                | <b>2004</b> | <b>6.378</b> |
| <b>Metoprolol</b>  | <b>rs16947/rs28371725 haplotype</b>                      | <b>15592325</b> | <b>Clinical pharmacology and therapeutics</b>                                | <b>2004</b> | <b>6.378</b> |
| <b>Metoprolol</b>  | <b>rs16947/rs59421388/rs61736512 haplotype</b>           | <b>15592325</b> | <b>Clinical pharmacology and therapeutics</b>                                | <b>2004</b> | <b>6.378</b> |
| Metoprolol         | rs1799752                                                | 20819590        | Chinese medical journal                                                      | 2010        | 0.983        |
| Metoprolol         | rs1801058                                                | 19119263        | American journal of hypertension                                             | 2009        | 3.129        |
| Metoprolol         | rs1801252                                                | 12844134        | Clinical pharmacology and therapeutics                                       | 2003        | 6.378        |
| Metoprolol         | rs1801252                                                | 15735607        | Clinical pharmacology and therapeutics                                       | 2005        | 6.378        |
| Metoprolol         | rs1801252                                                | 15864115        | Pharmacogenetics and genomics                                                | 2005        | 3.865        |
| Metoprolol         | rs1801252                                                | 16815314        | Clinical pharmacology and therapeutics                                       | 2006        | 6.378        |
| <b>Metoprolol</b>  | <b>rs1801253</b>                                         | <b>12844134</b> | <b>Clinical pharmacology and therapeutics</b>                                | <b>2003</b> | <b>6.378</b> |
| <b>Metoprolol</b>  | <b>rs1801253</b>                                         | <b>14534524</b> | <b>Clinical pharmacology and therapeutics</b>                                | <b>2003</b> | <b>6.378</b> |
| <b>Metoprolol</b>  | <b>rs1801253</b>                                         | <b>15735607</b> | <b>Clinical pharmacology and therapeutics</b>                                | <b>2005</b> | <b>6.378</b> |
| <b>Metoprolol</b>  | <b>rs1801253</b>                                         | <b>15864115</b> | <b>Pharmacogenetics and genomics</b>                                         | <b>2005</b> | <b>3.865</b> |
| <b>Metoprolol</b>  | <b>rs1801253</b>                                         | <b>16815314</b> | <b>Clinical pharmacology and therapeutics</b>                                | <b>2006</b> | <b>6.378</b> |
| <b>Metoprolol</b>  | <b>rs1801253</b>                                         | <b>17496726</b> | <b>Pharmacogenetics and genomics</b>                                         | <b>2007</b> | <b>3.865</b> |
| <b>Metoprolol</b>  | <b>rs1801253</b>                                         | <b>17541557</b> | <b>Naunyn-Schmiedeberg's archives of pharmacology</b>                        | <b>2007</b> | <b>2.5</b>   |
| <b>Metoprolol</b>  | <b>rs1801253</b>                                         | <b>21311897</b> | <b>Clinical research in cardiology : official journal of the German Car</b>  | <b>2011</b> | <b>3.466</b> |
| Metoprolol         | rs28371696                                               | 15592325        | Clinical pharmacology and therapeutics                                       | 2004        | 6.378        |
| <b>Metoprolol</b>  | <b>rs28371706</b>                                        | <b>15592325</b> | <b>Clinical pharmacology and therapeutics</b>                                | <b>2004</b> | <b>6.378</b> |
| <b>Metoprolol</b>  | <b>rs28371710/rs16947/rs1135840 haplotype</b>            | <b>15592325</b> | <b>Clinical pharmacology and therapeutics</b>                                | <b>2004</b> | <b>6.378</b> |
| <b>Metoprolol</b>  | <b>rs28371710/rs16947/rs1135840/rs28371696 haplotype</b> | <b>15592325</b> | <b>Clinical pharmacology and therapeutics</b>                                | <b>2004</b> | <b>6.378</b> |
| Metoprolol         | rs2960306                                                | 19119263        | American journal of hypertension                                             | 2009        | 3.129        |
| <b>Metoprolol</b>  | <b>rs35742686</b>                                        | <b>15592325</b> | <b>Clinical pharmacology and therapeutics</b>                                | <b>2004</b> | <b>6.378</b> |
| <b>Metoprolol</b>  | <b>rs3892097</b>                                         | <b>15592325</b> | <b>Clinical pharmacology and therapeutics</b>                                | <b>2004</b> | <b>6.378</b> |
| Metoprolol         | rs3892097                                                | 18784654        | Clinical pharmacology and therapeutics                                       | 2009        | 6.378        |
| Metoprolol         | rs4253778                                                | 18855529        | Pharmacogenomics                                                             | 2008        | 3.876        |
| Metoprolol         | rs4994                                                   | 16027735        | The pharmacogenomics journal                                                 | 2005        | 4.306        |
| <b>Metoprolol</b>  | <b>rs5030655</b>                                         | <b>15592325</b> | <b>Clinical pharmacology and therapeutics</b>                                | <b>2004</b> | <b>6.378</b> |
| <b>Metoprolol</b>  | <b>rs5030656</b>                                         | <b>15592325</b> | <b>Clinical pharmacology and therapeutics</b>                                | <b>2004</b> | <b>6.378</b> |
| Metoprolol         | rs61767072                                               | 17496726        | Pharmacogenetics and genomics                                                | 2007        | 3.865        |
| Niacin             | rs1800588                                                | 11171785        | Circulation                                                                  | 2001        | 14.432       |
| Nifedipine         | CYP3A4 -292A>G                                           | 10511065        | Clinical pharmacology and therapeutics                                       | 1999        | 6.378        |
| Nifedipine         | rs1048101                                                | 19444285        | Journal of human genetics                                                    | 2009        | 2.496        |
| Nifedipine         | rs10494366                                               | 19076153        | British journal of clinical pharmacology                                     | 2009        | 3.063        |
| Nifedipine         | rs1123617                                                | 17344938        | Methods and findings in experimental and clinical pharmacology               | 2007        | 1.037        |
| Nifedipine         | rs1799752                                                | 15233837        | Clinical physiology and functional imaging                                   | 2004        | 1.302        |
| <b>Nifedipine</b>  | <b>rs2238032</b>                                         | <b>16610939</b> | <b>Pharmacogenomics</b>                                                      | <b>2006</b> | <b>3.876</b> |
| Nifedipine         | rs28371759                                               | 15634941        | The Journal of pharmacology and experimental therapeutics                    | 2005        | 4.017        |
| Nifedipine         | rs3745009                                                | 17344938        | Methods and findings in experimental and clinical pharmacology               | 2007        | 1.037        |
| Nifedipine         | rs3918242                                                | 21769110        | The pharmacogenomics journal                                                 | 2011        | 4.306        |
| Nifedipine         | rs4986910                                                | 15634941        | The Journal of pharmacology and experimental therapeutics                    | 2005        | 4.017        |
| Nifedipine         | rs4986913                                                | 15634941        | The Journal of pharmacology and experimental therapeutics                    | 2005        | 4.017        |
| Nifedipine         | rs4987161                                                | 15634941        | The Journal of pharmacology and experimental therapeutics                    | 2005        | 4.017        |
| Nifedipine         | rs776746                                                 | 15634941        | The Journal of pharmacology and experimental therapeutics                    | 2005        | 4.017        |
| Olmesartan         | rs2306283                                                | 18641915        | Journal of human genetics                                                    | 2008        | 2.496        |
| Olmesartan         | rs2306283/rs4149056 haplotype                            | 18641915        | Journal of human genetics                                                    | 2008        | 2.496        |
| <b>Perindopril</b> | <b>rs1799752</b>                                         | <b>11007831</b> | <b>Nephrology, dialysis, transplantation : official publication of the I</b> | <b>2001</b> | <b>3.564</b> |
| <b>Perindopril</b> | <b>rs1799752</b>                                         | <b>11699055</b> | <b>Metabolism: clinical and experimental</b>                                 | <b>2000</b> | <b>2.538</b> |
| <b>Perindopril</b> | <b>rs1799752</b>                                         | <b>15673060</b> | <b>Nutrition, metabolism, and cardiovascular diseases : NMCD</b>             | <b>2004</b> | <b>3.438</b> |
| Perindopril        | rs1799768                                                | 15673060        | Nutrition, metabolism, and cardiovascular diseases : NMCD                    | 2004        | 3.438        |
| Perindopril        | rs5186                                                   | 8952600         | Hypertension                                                                 | 1996        | 6.908        |
| Perindopril        | rs5186                                                   | 17261465        | American journal of hypertension                                             | 2007        | 3.129        |
| Phenprocoumon      | rs1051740                                                | 21057703        | Thrombosis and haemostasis                                                   | 2011        | 4.701        |
| Phenprocoumon      | rs1057910                                                | 12728288        | European journal of clinical pharmacology                                    | 2003        | 3.032        |
| Phenprocoumon      | rs1057910                                                | 15128047        | Pharmacogenetics                                                             | 2004        |              |
| Phenprocoumon      | rs1057910                                                | 15536456        | Clinical pharmacology and therapeutics                                       | 2004        | 6.378        |
| Phenprocoumon      | rs1057910                                                | 19319511        | European journal of clinical pharmacology                                    | 2009        | 3.032        |
| Phenprocoumon      | rs1057910                                                | 20020283        | European journal of clinical pharmacology                                    | 2010        | 3.032        |
| Phenprocoumon      | rs1057910                                                | 20376629        | European journal of clinical pharmacology                                    | 2010        | 3.032        |
| Phenprocoumon      | rs1057910                                                | 21057703        | Thrombosis and haemostasis                                                   | 2011        | 4.701        |
| Phenprocoumon      | rs10871454                                               | 21063236        | Pharmacogenetics and genomics                                                | 2011        | 3.865        |

|                    |                                         |                 |                                                                         |             |               |
|--------------------|-----------------------------------------|-----------------|-------------------------------------------------------------------------|-------------|---------------|
| Phenprocoumon      | rs1799853                               | 15128047        | Pharmacogenetics                                                        | 2004        |               |
| Phenprocoumon      | rs1799853                               | 15536456        | Clinical pharmacology and therapeutics                                  | 2004        | 6.378         |
| Phenprocoumon      | rs1799853                               | 19319511        | European journal of clinical pharmacology                               | 2009        | 3.032         |
| Phenprocoumon      | rs1799853                               | 21057703        | Thrombosis and haemostasis                                              | 2011        | 4.701         |
| Phenprocoumon      | rs2108622                               | 21063236        | Pharmacogenetics and genomics                                           | 2011        | 3.865         |
| Phenprocoumon      | rs4086116                               | 21063236        | Pharmacogenetics and genomics                                           | 2011        | 3.865         |
| Phenprocoumon      | rs8050894                               | 19319511        | European journal of clinical pharmacology                               | 2009        | 3.032         |
| Phenprocoumon      | rs9923231                               | 20376629        | European journal of clinical pharmacology                               | 2010        | 3.032         |
| Phenprocoumon      | rs9923231                               | 21057703        | Thrombosis and haemostasis                                              | 2011        | 4.701         |
| Phenprocoumon      | rs9934438                               | 16201835        | PLoS medicine                                                           | 2005        | 15.617        |
| Phenprocoumon      | rs9934438                               | 20020283        | European journal of clinical pharmacology                               | 2010        | 3.032         |
| Phenprocoumon      | VKORC1 haplotype A                      | 19319511        | European journal of clinical pharmacology                               | 2009        | 3.032         |
| Phenprocoumon      | VKORC1 haplotype B                      | 19319511        | European journal of clinical pharmacology                               | 2009        | 3.032         |
| Pravastatin        | CBS In/Del                              | 18622257        | Pharmacogenetics and genomics                                           | 2008        | 3.865         |
| Pravastatin        | CETP CCC+784A                           | 18957472        | European heart journal                                                  | 2008        | 10.052        |
| Pravastatin        | CYP7A1 -278A>C                          | 15707388        | Clinical science (London, England : 1979)                               | 2005        | 4.613         |
| Pravastatin        | eNOS VNTR intron 4                      | 12483466        | Journal of molecular medicine (Berlin, Germany)                         | 2002        | 5.192         |
| Pravastatin        | rs1011685                               | 20339536        | PloS one                                                                | 2010        | 4.411         |
| Pravastatin        | rs11265260                              | 18439552        | American journal of human genetics                                      | 2008        | 11.68         |
| Pravastatin        | rs113646094                             | 17047488        | Pharmacogenetics and genomics                                           | 2006        | 3.865         |
| Pravastatin        | rs11666735                              | 17008591        | Arteriosclerosis, thrombosis, and vascular biology                      | 2006        | 7.215         |
| Pravastatin        | rs12003906                              | 20031551        | Circulation. Cardiovascular genetics                                    | 2008        |               |
| Pravastatin        | rs12093699                              | 18439552        | American journal of human genetics                                      | 2008        | 11.68         |
| Pravastatin        | rs12149545                              | 18957472        | European heart journal                                                  | 2008        | 10.052        |
| Pravastatin        | rs1260326                               | 20339536        | PloS one                                                                | 2010        | 4.411         |
| Pravastatin        | rs12654264                              | 20403997        | Cancer prevention research (Philadelphia, Pa.)                          | 2010        |               |
| Pravastatin        | rs1433099                               | 18261733        | Atherosclerosis                                                         | 2008        | 4.086         |
| Pravastatin        | rs16944                                 | 14515062        | Pharmacogenetics                                                        | 2003        |               |
| <b>Pravastatin</b> | <b>rs17238540</b>                       | <b>15199031</b> | <b>JAMA : the journal of the American Medical Association</b>           | <b>2004</b> | <b>30.011</b> |
| <b>Pravastatin</b> | <b>rs17238540</b>                       | <b>19923996</b> | <b>European journal of cardiovascular prevention and rehabilitation</b> | <b>2010</b> | <b>2.638</b>  |
| <b>Pravastatin</b> | <b>rs17238540</b>                       | <b>20409966</b> | <b>Journal of the American Society of Hypertension : JASH</b>           | <b>2009</b> | <b></b>       |
| <b>Pravastatin</b> | <b>rs17244841</b>                       | <b>15199031</b> | <b>JAMA : the journal of the American Medical Association</b>           | <b>2004</b> | <b>30.011</b> |
| Pravastatin        | rs17655652                              | 19752398        | Journal of lipid research                                               | 2010        | 6.115         |
| Pravastatin        | rs17876008                              | 12208481        | Atherosclerosis                                                         | 2002        | 4.086         |
| Pravastatin        | rs1799752                               | 12695469        | Heart (British Cardiac Society)                                         | 2003        | 4.708         |
| Pravastatin        | rs1799752/rs5918                        | 11545752        | The American journal of cardiology                                      | 2001        | 3.681         |
| Pravastatin        | rs1800588                               | 16115483        | Atherosclerosis                                                         | 2005        | 4.086         |
| Pravastatin        | rs1800591                               | 15136504        | Circulation                                                             | 2004        | 14.432        |
| Pravastatin        | rs1800775                               | 18957472        | European heart journal                                                  | 2008        | 10.052        |
| Pravastatin        | rs1800790                               | 9484992         | Arteriosclerosis, thrombosis, and vascular biology                      | 1998        | 7.215         |
| Pravastatin        | rs1800795                               | 11950697        | Arteriosclerosis, thrombosis, and vascular biology                      | 2002        | 7.215         |
| Pravastatin        | rs1801133                               | 18622257        | Pharmacogenetics and genomics                                           | 2008        | 3.865         |
| Pravastatin        | rs1883025                               | 20339536        | PloS one                                                                | 2010        | 4.411         |
| Pravastatin        | rs1935349                               | 17600820        | Muscle & nerve                                                          | 2007        | 2.302         |
| Pravastatin        | rs2032582                               | 16103896        | The pharmacogenomics journal                                            | 2005        | 4.306         |
| Pravastatin        | rs2032582                               | 19667110        | Arteriosclerosis, thrombosis, and vascular biology                      | 2009        | 7.215         |
| Pravastatin        | rs20455                                 | 18222353        | Journal of the American College of Cardiology                           | 2008        | 14.293        |
| Pravastatin        | rs20455                                 | 18222355        | Journal of the American College of Cardiology                           | 2008        | 14.293        |
| Pravastatin        | rs20455                                 | 20215968        | European journal of cardiovascular prevention and rehabilitation :      | 2010        | 2.638         |
| Pravastatin        | rs20455                                 | 20403483        | The American journal of cardiology                                      | 2010        | 3.681         |
| Pravastatin        | rs20455                                 | 20854963        | The American journal of cardiology                                      | 2010        | 3.681         |
| Pravastatin        | rs20455                                 | 20886236        | Human genetics                                                          | 2011        | 5.047         |
| Pravastatin        | rs2075650                               | 18439552        | American journal of human genetics                                      | 2008        | 11.68         |
| Pravastatin        | rs2234884                               | 19673941        | Clinical and experimental pharmacology & physiology                     | 2009        | 1.96          |
| Pravastatin        | rs2276307                               | 17600820        | Muscle & nerve                                                          | 2007        | 2.302         |
| Pravastatin        | rs2306283                               | 12811365        | Clinical pharmacology and therapeutics                                  | 2003        | 6.378         |
| Pravastatin        | rs2306283                               | 15116054        | Clinical pharmacology and therapeutics                                  | 2004        | 6.378         |
| Pravastatin        | rs2306283                               | 17622941        | Pharmacogenetics and genomics                                           | 2007        | 3.865         |
| Pravastatin        | rs2306283/rs4149056 haplotype           | 12811365        | Clinical pharmacology and therapeutics                                  | 2003        | 6.378         |
| Pravastatin        | rs2306283/rs4149056 haplotype           | 19776292        | Journal of clinical pharmacology                                        | 2009        | 3.59          |
| Pravastatin        | rs2306283/rs4149056/rs4149015 haplotype | 12811365        | Clinical pharmacology and therapeutics                                  | 2003        | 6.378         |
| Pravastatin        | rs2306283/rs4149056/rs4149015 haplotype | 15226675        | Pharmacogenetics                                                        | 2004        |               |
| Pravastatin        | rs2306283/rs4149056/rs4149015 haplotype | 15864131        | Pharmacogenetics and genomics                                           | 2005        | 3.865         |
| Pravastatin        | rs247616                                | 20339536        | PloS one                                                                | 2010        | 4.411         |
| Pravastatin        | rs2592887                               | 18439552        | American journal of human genetics                                      | 2008        | 11.68         |
| Pravastatin        | rs2738466                               | 18261733        | Atherosclerosis                                                         | 2008        | 4.086         |
| Pravastatin        | rs2794520                               | 18439552        | American journal of human genetics                                      | 2008        | 11.68         |
| Pravastatin        | rs3025058                               | 10190398        | The American journal of cardiology                                      | 1999        | 3.681         |
| <b>Pravastatin</b> | <b>rs4149056</b>                        | <b>12811365</b> | <b>Clinical pharmacology and therapeutics</b>                           | <b>2003</b> | <b>6.378</b>  |
| <b>Pravastatin</b> | <b>rs4149056</b>                        | <b>15116054</b> | <b>Clinical pharmacology and therapeutics</b>                           | <b>2004</b> | <b>6.378</b>  |
| <b>Pravastatin</b> | <b>rs4149056</b>                        | <b>15226675</b> | <b>Pharmacogenetics</b>                                                 | <b>2004</b> | <b></b>       |
| <b>Pravastatin</b> | <b>rs4149056</b>                        | <b>16722833</b> | <b>British journal of clinical pharmacology</b>                         | <b>2006</b> | <b>3.063</b>  |
| <b>Pravastatin</b> | <b>rs4149056</b>                        | <b>17015053</b> | <b>Clinical pharmacology and therapeutics</b>                           | <b>2006</b> | <b>6.378</b>  |
| <b>Pravastatin</b> | <b>rs4149056</b>                        | <b>17439540</b> | <b>British journal of clinical pharmacology</b>                         | <b>2007</b> | <b>3.063</b>  |
| <b>Pravastatin</b> | <b>rs4149056</b>                        | <b>17622941</b> | <b>Pharmacogenetics and genomics</b>                                    | <b>2007</b> | <b>3.865</b>  |
| <b>Pravastatin</b> | <b>rs4149056</b>                        | <b>19833260</b> | <b>Journal of the American College of Cardiology</b>                    | <b>2009</b> | <b>14.293</b> |
| Pravastatin        | rs428785                                | 18174457        | Arteriosclerosis, thrombosis, and vascular biology                      | 2008        | 7.215         |
| Pravastatin        | rs429358/rs7412 haplotype               | 7605354         | Atherosclerosis                                                         | 1995        | 4.086         |
| Pravastatin        | rs429358/rs7412 haplotype               | 8344125         | Diabetes research and clinical practice                                 | 1993        | 2.134         |
| Pravastatin        | rs429358/rs7412 haplotype               | 16869455        | Acta cardiologica                                                       | 2006        | 0.65          |
| Pravastatin        | rs429358/rs7412 haplotype               | 17852827        | Scandinavian journal of clinical and laboratory investigation           | 2007        | 1.629         |
| Pravastatin        | rs429358/rs7412 haplotype               | 19667110        | Arteriosclerosis, thrombosis, and vascular biology                      | 2009        | 7.215         |

|                     |                           |                 |                                                                          |             |               |
|---------------------|---------------------------|-----------------|--------------------------------------------------------------------------|-------------|---------------|
| Pravastatin         | rs429358/rs7412 haplotype | 20031551        | Circulation. Cardiovascular genetics                                     | 2008        |               |
| Pravastatin         | rs4420638                 | 20339536        | PloS one                                                                 | 2010        | 4.411         |
| Pravastatin         | rs4775041                 | 20339536        | PloS one                                                                 | 2010        | 4.411         |
| <b>Pravastatin</b>  | <b>rs4986790</b>          | <b>12742999</b> | <b>Circulation</b>                                                       | <b>2003</b> | <b>14.432</b> |
| Pravastatin         | rs5443                    | 18551043        | Pharmacogenetics and genomics                                            | 2008        | 3.865         |
| Pravastatin         | rs6025                    | 19415820        | Pharmacogenetics and genomics                                            | 2009        | 3.865         |
| Pravastatin         | rs6046                    | 19415820        | Pharmacogenetics and genomics                                            | 2009        | 3.865         |
| Pravastatin         | rs646776                  | 20339536        | PloS one                                                                 | 2010        | 4.411         |
| Pravastatin         | rs6481464                 | 18439552        | American journal of human genetics                                       | 2008        | 11.68         |
| Pravastatin         | rs708272                  | 9420339         | The New England journal of medicine                                      | 1998        | 53.486        |
| Pravastatin         | rs708272                  | 15856070        | European journal of human genetics : EJHG                                | 2005        | 4.38          |
| Pravastatin         | rs708272                  | 18957472        | European heart journal                                                   | 2008        | 10.052        |
| Pravastatin         | rs735396                  | 18439552        | American journal of human genetics                                       | 2008        | 11.68         |
| Pravastatin         | rs7633531                 | 20339536        | PloS one                                                                 | 2010        | 4.411         |
| Pravastatin         | rs7730843                 | 18439552        | American journal of human genetics                                       | 2008        | 11.68         |
| Pravastatin         | rs7953249                 | 18439552        | American journal of human genetics                                       | 2008        | 11.68         |
| Pravastatin         | rs8014194                 | 20339536        | PloS one                                                                 | 2010        | 4.411         |
| Pravastatin         | rs9462535                 | 20886236        | Human genetics                                                           | 2011        | 5.047         |
| Pravastatin         | rs9471077                 | 20886236        | Human genetics                                                           | 2011        | 5.047         |
| Pravastatin         | rs964184                  | 20339536        | PloS one                                                                 | 2010        | 4.411         |
| Pravastatin         | rs9644568                 | 20339536        | PloS one                                                                 | 2010        | 4.411         |
| Quinapril           | rs1799752                 | 11954942        | Circulation journal : official journal of the Japanese Circulation Soc   | 2002        | 3.225         |
| Quinapril           | rs1799752                 | 15526248        | Journal of the renin-angiotensin-aldosterone system : JRAAS              | 2004        | 1.6           |
| Quinapril           | rs1799752                 | 16116691        | Thrombosis and haemostasis                                               | 2005        | 4.701         |
| Quinapril           | rs699                     | 11849656        | Atherosclerosis                                                          | 2002        | 4.086         |
| Ramipril            | rs1799752                 | 10616844        | Journal of the American Society of Nephrology : JASN                     | 2000        | 8.288         |
| Ramipril            | rs1799752                 | 16186399        | Diabetes                                                                 | 2005        | 8.889         |
| Ramipril            | rs1799752                 | 17885551        | Journal of hypertension                                                  | 2007        | 3.98          |
| Ramipril            | rs1799768                 | 11804984        | Circulation                                                              | 2002        | 14.432        |
| Rosuvastatin        | rs1169288                 | 21094359        | The American journal of cardiology                                       | 2010        | 3.681         |
| Rosuvastatin        | rs1205                    | 21094359        | The American journal of cardiology                                       | 2010        | 3.681         |
| Rosuvastatin        | rs1736557                 | 20679960        | Pharmacogenetics and genomics                                            | 2010        | 3.865         |
| <b>Rosuvastatin</b> | <b>rs2231142</b>          | <b>16784736</b> | <b>Clinica chimica acta; international journal of clinical chemistry</b> | <b>2006</b> | <b>2.389</b>  |
| <b>Rosuvastatin</b> | <b>rs2231142</b>          | <b>19474787</b> | <b>Clinical pharmacology and therapeutics</b>                            | <b>2009</b> | <b>6.378</b>  |
| <b>Rosuvastatin</b> | <b>rs2231142</b>          | <b>20130569</b> | <b>Clinical pharmacology and therapeutics</b>                            | <b>2010</b> | <b>6.378</b>  |
| <b>Rosuvastatin</b> | <b>rs2231142</b>          | <b>20207952</b> | <b>Circulation. Cardiovascular genetics</b>                              | <b>2010</b> | <b></b>       |
| <b>Rosuvastatin</b> | <b>rs2231142</b>          | <b>20679960</b> | <b>Pharmacogenetics and genomics</b>                                     | <b>2010</b> | <b>3.865</b>  |
| Rosuvastatin        | rs2306283                 | 17568401        | Clinical pharmacology and therapeutics                                   | 2008        | 6.378         |
| Rosuvastatin        | rs2808630                 | 21094359        | The American journal of cardiology                                       | 2010        | 3.681         |
| Rosuvastatin        | rs328                     | 20679960        | Pharmacogenetics and genomics                                            | 2010        | 3.865         |
| Rosuvastatin        | rs34724                   | 20602615        | Pharmacogenomics                                                         | 2010        | 3.876         |
| Rosuvastatin        | rs4149056                 | 17473846        | Clinical pharmacology and therapeutics                                   | 2007        | 6.378         |
| Rosuvastatin        | rs4149056                 | 17568401        | Clinical pharmacology and therapeutics                                   | 2008        | 6.378         |
| Rosuvastatin        | rs4420638                 | 20679960        | Pharmacogenetics and genomics                                            | 2010        | 3.865         |
| Rosuvastatin        | rs5443                    | 18551043        | Pharmacogenetics and genomics                                            | 2008        | 3.865         |
| Rosuvastatin        | rs776746                  | 20207952        | Circulation. Cardiovascular genetics                                     | 2010        |               |
| Simvastatin         | CYP3AP1 -44G>A            | 20519697        | Journal of clinical pharmacology                                         | 2011        | 3.59          |
| Simvastatin         | HMGCR H2/H7 haplotype     | 20413733        | Arteriosclerosis, thrombosis, and vascular biology                       | 2010        | 7.215         |
| Simvastatin         | LOX-1 3'-UTRC>T           | 17050011        | International journal of cardiology                                      | 2007        | 6.802         |
| Simvastatin         | rs10038095                | 18332269        | Circulation                                                              | 2008        | 14.432        |
| Simvastatin         | rs1011685                 | 20339536        | PloS one                                                                 | 2010        | 4.411         |
| Simvastatin         | rs1045642                 | 16321621        | Clinical pharmacology and therapeutics                                   | 2005        | 6.378         |
| Simvastatin         | rs1045642                 | 19238649        | Clinical pharmacology and therapeutics                                   | 2008        | 6.378         |
| Simvastatin         | rs1045642                 | 19802823        | Pharmacoepidemiology and drug safety                                     | 2010        | 2.342         |
| Simvastatin         | rs1045642                 | 19891551        | Pharmacogenomics                                                         | 2009        | 3.876         |
| Simvastatin         | rs11265260                | 18439552        | American journal of human genetics                                       | 2008        | 11.68         |
| Simvastatin         | rs1128503                 | 16321621        | Clinical pharmacology and therapeutics                                   | 2005        | 6.378         |
| Simvastatin         | rs1128503                 | 19238649        | Clinical pharmacology and therapeutics                                   | 2008        | 6.378         |
| Simvastatin         | rs1128503                 | 19891551        | Pharmacogenomics                                                         | 2009        | 3.876         |
| Simvastatin         | rs1137101                 | 14625131        | Diabetes research and clinical practice                                  | 2003        | 2.134         |
| Simvastatin         | rs1137101                 | 18854995        | European journal of clinical pharmacology                                | 2009        | 3.032         |
| Simvastatin         | rs12003906                | 20031551        | Circulation. Cardiovascular genetics                                     | 2008        |               |
| Simvastatin         | rs12093699                | 18439552        | American journal of human genetics                                       | 2008        | 11.68         |
| Simvastatin         | rs12487736                | 16158080        | The pharmacogenomics journal                                             | 2005        | 4.306         |
| Simvastatin         | rs1260326                 | 20339536        | PloS one                                                                 | 2010        | 4.411         |
| Simvastatin         | rs12654264                | 20403997        | Cancer prevention research (Philadelphia, Pa.)                           | 2010        |               |
| Simvastatin         | rs14158                   | 20413733        | Arteriosclerosis, thrombosis, and vascular biology                       | 2010        | 7.215         |
| Simvastatin         | rs1433099                 | 20413733        | Arteriosclerosis, thrombosis, and vascular biology                       | 2010        | 7.215         |
| Simvastatin         | rs17238540                | 18332269        | Circulation                                                              | 2008        | 14.432        |
| Simvastatin         | rs17244841                | 18332269        | Circulation                                                              | 2008        | 14.432        |
| Simvastatin         | rs17249057                | 20413733        | Arteriosclerosis, thrombosis, and vascular biology                       | 2010        | 7.215         |
| Simvastatin         | rs1800206                 | 16275545        | European journal of internal medicine                                    | 2005        | 1.657         |
| Simvastatin         | rs1883025                 | 20339536        | PloS one                                                                 | 2010        | 4.411         |
| Simvastatin         | rs1935349                 | 17600820        | Muscle & nerve                                                           | 2007        | 2.302         |
| <b>Simvastatin</b>  | <b>rs2032582</b>          | <b>16103896</b> | <b>The pharmacogenomics journal</b>                                      | <b>2005</b> | <b>4.306</b>  |
| <b>Simvastatin</b>  | <b>rs2032582</b>          | <b>16321621</b> | <b>Clinical pharmacology and therapeutics</b>                            | <b>2005</b> | <b>6.378</b>  |
| <b>Simvastatin</b>  | <b>rs2032582</b>          | <b>19238649</b> | <b>Clinical pharmacology and therapeutics</b>                            | <b>2008</b> | <b>6.378</b>  |
| <b>Simvastatin</b>  | <b>rs2032582</b>          | <b>19891551</b> | <b>Pharmacogenomics</b>                                                  | <b>2009</b> | <b>3.876</b>  |
| Simvastatin         | rs2075650                 | 18439552        | American journal of human genetics                                       | 2008        | 11.68         |
| Simvastatin         | rs2231142                 | 19842935        | Pharmacogenomics                                                         | 2009        | 3.876         |
| Simvastatin         | rs2231142                 | 20207952        | Circulation. Cardiovascular genetics                                     | 2010        |               |
| Simvastatin         | rs2276307                 | 17600820        | Muscle & nerve                                                           | 2007        | 2.302         |

|                    |                                                       |                 |                                                                      |             |               |
|--------------------|-------------------------------------------------------|-----------------|----------------------------------------------------------------------|-------------|---------------|
| Simvastatin        | rs247616                                              | 20339536        | PloS one                                                             | 2010        | 4.411         |
| Simvastatin        | rs2592887                                             | 18439552        | American journal of human genetics                                   | 2008        | 11.68         |
| Simvastatin        | rs2738467                                             | 20413733        | Arteriosclerosis, thrombosis, and vascular biology                   | 2010        | 7.215         |
| Simvastatin        | rs2740574                                             | 19802823        | Pharmacoepidemiology and drug safety                                 | 2010        | 2.342         |
| Simvastatin        | rs2794520                                             | 18439552        | American journal of human genetics                                   | 2008        | 11.68         |
| Simvastatin        | rs34724                                               | 20602615        | Pharmacogenomics                                                     | 2010        | 3.876         |
| Simvastatin        | rs3846663                                             | 18332269        | Circulation                                                          | 2008        | 14.432        |
| Simvastatin        | rs3892097                                             | 17289397        | Pharmacological research : the official journal of the Italian Pharm | 2007        | 3.612         |
| Simvastatin        | rs3917643                                             | 19027114        | Atherosclerosis                                                      | 2009        | 4.086         |
| <b>Simvastatin</b> | <b>rs4149056</b>                                      | <b>17108811</b> | <b>Pharmacogenetics and genomics</b>                                 | <b>2006</b> | <b>3.865</b>  |
| <b>Simvastatin</b> | <b>rs4149056</b>                                      | <b>18650507</b> | <b>The New England journal of medicine</b>                           | <b>2008</b> | <b>53.486</b> |
| <b>Simvastatin</b> | <b>rs4149056</b>                                      | <b>19833260</b> | <b>Journal of the American College of Cardiology</b>                 | <b>2009</b> | <b>14.293</b> |
| Simvastatin        | rs429358/rs7412 haplotype                             | 2390138         | Atherosclerosis                                                      | 1990        | 4.086         |
| Simvastatin        | rs429358/rs7412 haplotype                             | 12901521        | Chinese medical sciences journal = Chung-kuo i hsueh k'o hsueh ts    | 2003        |               |
| Simvastatin        | rs429358/rs7412 haplotype                             | 16103896        | The pharmacogenomics journal                                         | 2005        | 4.306         |
| Simvastatin        | rs429358/rs7412 haplotype                             | 17199722        | Diabetes, obesity & metabolism                                       | 2007        | 3.415         |
| Simvastatin        | rs429358/rs7412 haplotype                             | 17289397        | Pharmacological research : the official journal of the Italian Pharm | 2007        | 3.612         |
| Simvastatin        | rs429358/rs7412 haplotype                             | 20031551        | Circulation. Cardiovascular genetics                                 | 2008        |               |
| Simvastatin        | rs4363657                                             | 18650507        | The New England journal of medicine                                  | 2008        | 53.486        |
| Simvastatin        | rs4420638                                             | 20339536        | PloS one                                                             | 2010        | 4.411         |
| Simvastatin        | rs4673                                                | 15936011        | Clinica chimica acta; international journal of clinical chemistry    | 2005        | 2.389         |
| Simvastatin        | rs4775041                                             | 20339536        | PloS one                                                             | 2010        | 4.411         |
| Simvastatin        | rs5443                                                | 18551043        | Pharmacogenetics and genomics                                        | 2008        | 3.865         |
| Simvastatin        | rs55951658                                            | 15650881        | European journal of clinical pharmacology                            | 2005        | 3.032         |
| Simvastatin        | rs5742911                                             | 20413733        | Arteriosclerosis, thrombosis, and vascular biology                   | 2010        | 7.215         |
| Simvastatin        | rs5882                                                | 17931083        | Expert opinion on pharmacotherapy                                    | 2007        | 2.403         |
| Simvastatin        | rs6453131                                             | 18332269        | Circulation                                                          | 2008        | 14.432        |
| Simvastatin        | rs646776                                              | 20339536        | PloS one                                                             | 2010        | 4.411         |
| Simvastatin        | rs6481464                                             | 18439552        | American journal of human genetics                                   | 2008        | 11.68         |
| Simvastatin        | rs662                                                 | 16238680        | Journal of internal medicine                                         | 2005        | 5.935         |
| Simvastatin        | rs662                                                 | 18430057        | Clinical and experimental pharmacology & physiology                  | 2008        | 1.96          |
| Simvastatin        | rs662799                                              | 19530961        | Pharmacogenomics                                                     | 2009        | 3.876         |
| Simvastatin        | rs705379                                              | 16238680        | Journal of internal medicine                                         | 2005        | 5.935         |
| Simvastatin        | rs708272                                              | 15856070        | European journal of human genetics : EJHG                            | 2005        | 4.38          |
| Simvastatin        | rs7254521                                             | 20413733        | Arteriosclerosis, thrombosis, and vascular biology                   | 2010        | 7.215         |
| Simvastatin        | rs735396                                              | 18439552        | American journal of human genetics                                   | 2008        | 11.68         |
| Simvastatin        | rs7633531                                             | 20339536        | PloS one                                                             | 2010        | 4.411         |
| Simvastatin        | rs7730843                                             | 18439552        | American journal of human genetics                                   | 2008        | 11.68         |
| Simvastatin        | rs776746                                              | 15284534        | Pharmacogenetics                                                     | 2004        |               |
| Simvastatin        | rs776746                                              | 17192506        | Journal of clinical pharmacology                                     | 2007        | 3.59          |
| Simvastatin        | rs776746                                              | 20207952        | Circulation. Cardiovascular genetics                                 | 2010        |               |
| Simvastatin        | rs7953249                                             | 18439552        | American journal of human genetics                                   | 2008        | 11.68         |
| Simvastatin        | rs8014194                                             | 20339536        | PloS one                                                             | 2010        | 4.411         |
| Simvastatin        | rs964184                                              | 20339536        | PloS one                                                             | 2010        | 4.411         |
| Simvastatin        | rs9644568                                             | 20339536        | PloS one                                                             | 2010        | 4.411         |
| Spirolactone       | rs1799752                                             | 15121491        | The American journal of medicine                                     | 2004        | 5.115         |
| Spirolactone       | rs1799998                                             | 16118341        | The Journal of clinical endocrinology and metabolism                 | 2005        | 6.495         |
| Spirolactone       | rs1799998                                             | 17631084        | The American journal of cardiology                                   | 2007        | 3.681         |
| Spirolactone       | rs4539                                                | 16118341        | The Journal of clinical endocrinology and metabolism                 | 2005        | 6.495         |
| Torsemide          | rs1529927                                             | 17460608        | Clinical pharmacology and therapeutics                               | 2007        | 6.378         |
| Torsemide          | rs1799752                                             | 20877298        | The pharmacogenomics journal                                         | 2012        | 4.306         |
| Torsemide          | rs4961                                                | 20877298        | The pharmacogenomics journal                                         | 2012        | 4.306         |
| Torsemide          | rs5063                                                | 20877298        | The pharmacogenomics journal                                         | 2012        | 4.306         |
| Torsemide          | rs5065                                                | 20877298        | The pharmacogenomics journal                                         | 2012        | 4.306         |
| Torsemide          | rs5443                                                | 20877298        | The pharmacogenomics journal                                         | 2012        | 4.306         |
| Torsemide          | rs5723                                                | 17460608        | Clinical pharmacology and therapeutics                               | 2007        | 6.378         |
| Torsemide          | rs5729                                                | 17460608        | Clinical pharmacology and therapeutics                               | 2007        | 6.378         |
| Verapamil          | CYP3A5 Genotype-derived phenotype (i.e. PM, EM, etc.) | 17443134        | Clinical pharmacology and therapeutics                               | 2007        | 6.378         |
| Verapamil          | rs10264272                                            | 17339868        | Clinical pharmacology and therapeutics                               | 2007        | 6.378         |
| Verapamil          | rs1045642                                             | 19740397        | British journal of clinical pharmacology                             | 2009        | 3.063         |
| Verapamil          | rs10494366                                            | 19247217        | Pharmacogenetics and genomics                                        | 2009        | 3.865         |
| Verapamil          | rs1051375                                             | 20031608        | Circulation. Cardiovascular genetics                                 | 2009        |               |
| Verapamil          | rs10918594                                            | 19247217        | Pharmacogenetics and genomics                                        | 2009        | 3.865         |
| Verapamil          | rs11014166                                            | 21156931        | Circulation. Cardiovascular genetics                                 | 2010        |               |
| Verapamil          | rs1799752                                             | 10334805        | Hypertension                                                         | 1999        | 6.908         |
| <b>Verapamil</b>   | <b>rs1801252/rs1801253 haplotype</b>                  | <b>18615004</b> | <b>Clinical pharmacology and therapeutics</b>                        | <b>2008</b> | <b>6.378</b>  |
| Verapamil          | rs2032582                                             | 19740397        | British journal of clinical pharmacology                             | 2009        | 3.063         |
| Verapamil          | rs2301149                                             | 17700361        | Pharmacogenetics and genomics                                        | 2007        | 3.865         |
| Verapamil          | rs2357928                                             | 21156931        | Circulation. Cardiovascular genetics                                 | 2010        |               |
| Verapamil          | rs28939718                                            | 17700361        | Pharmacogenetics and genomics                                        | 2007        | 3.865         |
| Verapamil          | rs4961                                                | 18657677        | American heart journal                                               | 2008        | 5.052         |
| Verapamil          | rs776746                                              | 17339868        | Clinical pharmacology and therapeutics                               | 2007        | 6.378         |
| Warfarin           | CYP2C9 -65G>C                                         | 16413010        | Clinica chimica acta; international journal of clinical chemistry    | 2006        | 2.389         |
| Warfarin           | CYP2C9 42613A>C                                       | 17049586        | Thrombosis research                                                  | 2007        | 2.372         |
| Warfarin           | CYP2C9 527A>C                                         | 11588061        | Blood                                                                | 2001        | 10.558        |
| Warfarin           | CYP2C9 537A>C                                         | 11588061        | Blood                                                                | 2001        | 10.558        |
| Warfarin           | CYP2C9 561A>C                                         | 11588061        | Blood                                                                | 2001        | 10.558        |
| Warfarin           | CYP2C9 608T>G                                         | 11588061        | Blood                                                                | 2001        | 10.558        |
| Warfarin           | CYP2C9 Genotype-derived phenotype (i.e. PM, EM, etc.) | 21176721        | International journal of clinical pharmacology and therapeutics      | 2011        | 1.189         |
| Warfarin           | CYP2C9 IVS3-334C>T                                    | 20653674        | British journal of clinical pharmacology                             | 2010        | 3.063         |
| Warfarin           | CYP2C9 IVS3-65G>C                                     | 20653674        | British journal of clinical pharmacology                             | 2010        | 3.063         |
| Warfarin           | CYP2C9 IVS3+197G>A                                    | 20653674        | British journal of clinical pharmacology                             | 2010        | 3.063         |

|          |                    |          |                                                                                           |      |        |
|----------|--------------------|----------|-------------------------------------------------------------------------------------------|------|--------|
| Warfarin | CYP2C9 IVS4-115A>G | 20653674 | British journal of clinical pharmacology                                                  | 2010 | 3.063  |
| Warfarin | CYP2C9 IVS5-73A>G  | 20653674 | British journal of clinical pharmacology                                                  | 2010 | 3.063  |
| Warfarin | CYP2C9 Pro382Leu   | 15888487 | Human molecular genetics                                                                  | 2005 | 8.058  |
| Warfarin | F2 37-bp repeat    | 14656880 | Blood                                                                                     | 2004 | 10.558 |
| Warfarin | F7 -746T>C         | 14656880 | Blood                                                                                     | 2004 | 10.558 |
| Warfarin | GGC CAA repeat     | 14656880 | Blood                                                                                     | 2004 | 10.558 |
| Warfarin | rs10117842         | 18535201 | Blood                                                                                     | 2008 | 10.558 |
| Warfarin | rs1045642          | 21797966 | Journal of thrombosis and haemostasis : JTH                                               | 2011 | 5.439  |
| Warfarin | rs10489371         | 18535201 | Blood                                                                                     | 2008 | 10.558 |
| Warfarin | rs10503266         | 18535201 | Blood                                                                                     | 2008 | 10.558 |
| Warfarin | rs10509680         | 20833655 | Human molecular genetics                                                                  | 2010 | 8.058  |
| Warfarin | rs1057910          | 9630825  | Clinical pharmacology and therapeutics                                                    | 1998 | 6.378  |
| Warfarin | rs1057910          | 10073515 | Lancet                                                                                    | 1999 | 33.633 |
| Warfarin | rs1057910          | 10961881 | Blood                                                                                     | 2000 | 10.558 |
| Warfarin | rs1057910          | 11893129 | Journal of the American College of Surgeons                                               | 2002 | 4.241  |
| Warfarin | rs1057910          | 11926893 | JAMA : the journal of the American Medical Association                                    | 2002 | 30.011 |
| Warfarin | rs1057910          | 12496751 | Clinical pharmacology and therapeutics                                                    | 2002 | 6.378  |
| Warfarin | rs1057910          | 12621390 | Clinical pharmacology and therapeutics                                                    | 2003 | 6.378  |
| Warfarin | rs1057910          | 12913403 | Journal of thrombosis and thrombolysis                                                    | 2002 | 1.539  |
| Warfarin | rs1057910          | 14656880 | Blood                                                                                     | 2004 | 10.558 |
| Warfarin | rs1057910          | 14691573 | Thrombosis and haemostasis                                                                | 2004 | 4.701  |
| Warfarin | rs1057910          | 15001971 | Clinical pharmacology and therapeutics                                                    | 2004 | 6.378  |
| Warfarin | rs1057910          | 15001972 | Clinical pharmacology and therapeutics                                                    | 2004 | 6.378  |
| Warfarin | rs1057910          | 15070684 | Blood                                                                                     | 2004 | 10.558 |
| Warfarin | rs1057910          | 15175798 | Thrombosis and haemostasis                                                                | 2004 | 4.701  |
| Warfarin | rs1057910          | 15284536 | Pharmacogenetics                                                                          | 2004 |        |
| Warfarin | rs1057910          | 15608560 | Pharmacogenetics                                                                          | 2004 |        |
| Warfarin | rs1057910          | 15617742 | Thrombosis research                                                                       | 2005 | 2.372  |
| Warfarin | rs1057910          | 15824753 | The pharmacogenomics journal                                                              | 2005 | 4.306  |
| Warfarin | rs1057910          | 15883587 | The pharmacogenomics journal                                                              | 2005 | 4.306  |
| Warfarin | rs1057910          | 15888487 | Human molecular genetics                                                                  | 2005 | 8.058  |
| Warfarin | rs1057910          | 15900281 | Clinical pharmacology and therapeutics                                                    | 2005 | 6.378  |
| Warfarin | rs1057910          | 15947090 | Blood                                                                                     | 2005 | 10.558 |
| Warfarin | rs1057910          | 16303885 | Clinical medicine & research                                                              | 2005 |        |
| Warfarin | rs1057910          | 16321620 | Clinical pharmacology and therapeutics                                                    | 2005 | 6.378  |
| Warfarin | rs1057910          | 16432637 | Journal of human genetics                                                                 | 2006 | 2.496  |
| Warfarin | rs1057910          | 16580898 | Clinical pharmacology and therapeutics                                                    | 2006 | 6.378  |
| Warfarin | rs1057910          | 16611750 | Journal of medical genetics                                                               | 2006 | 7.037  |
| Warfarin | rs1057910          | 16815313 | Clinical pharmacology and therapeutics                                                    | 2006 | 6.378  |
| Warfarin | rs1057910          | 16890578 | Clinical pharmacology and therapeutics                                                    | 2006 | 6.378  |
| Warfarin | rs1057910          | 17167248 | Community genetics                                                                        | 2007 | 1.538  |
| Warfarin | rs1057910          | 17226852 | Pediatric blood & cancer                                                                  | 2008 | 1.948  |
| Warfarin | rs1057910          | 17391071 | Pharmacogenomics                                                                          | 2007 | 3.876  |
| Warfarin | rs1057910          | 17577464 | Clinical therapeutics                                                                     | 2007 | 2.551  |
| Warfarin | rs1057910          | 17653141 | Clinical pharmacology and therapeutics                                                    | 2008 | 6.378  |
| Warfarin | rs1057910          | 17721328 | Diagnostic molecular pathology : the American journal of surgical pathology               | 2007 | 2.129  |
| Warfarin | rs1057910          | 17899045 | European journal of clinical pharmacology                                                 | 2007 | 3.032  |
| Warfarin | rs1057910          | 17955230 | European journal of clinical pharmacology                                                 | 2008 | 3.032  |
| Warfarin | rs1057910          | 18030307 | Clinical pharmacology and therapeutics                                                    | 2008 | 6.378  |
| Warfarin | rs1057910          | 18034618 | Pharmacogenomics                                                                          | 2007 | 3.876  |
| Warfarin | rs1057910          | 18034619 | Pharmacogenomics                                                                          | 2007 | 3.876  |
| Warfarin | rs1057910          | 18183038 | Clinical pharmacology and therapeutics                                                    | 2008 | 6.378  |
| Warfarin | rs1057910          | 18211619 | Journal of clinical pharmacy and therapeutics                                             | 2008 | 1.649  |
| Warfarin | rs1057910          | 18322281 | The New England journal of medicine                                                       | 2008 | 53.486 |
| Warfarin | rs1057910          | 18535201 | Blood                                                                                     | 2008 | 10.558 |
| Warfarin | rs1057910          | 18542936 | European journal of clinical pharmacology                                                 | 2008 | 3.032  |
| Warfarin | rs1057910          | 18756910 | Collegium antropologicum                                                                  | 2008 |        |
| Warfarin | rs1057910          | 18836275 | Medical principles and practice : international journal of the Kuwait Medical Association | 2008 | 1.069  |
| Warfarin | rs1057910          | 18855533 | Pharmacogenomics                                                                          | 2008 | 3.876  |
| Warfarin | rs1057910          | 19077919 | Pharmacogenetics and genomics                                                             | 2009 | 3.865  |
| Warfarin | rs1057910          | 19297219 | Blood cells, molecules & diseases                                                         | 2009 | 2.716  |
| Warfarin | rs1057910          | 19300499 | PLoS genetics                                                                             | 2009 | 9.543  |
| Warfarin | rs1057910          | 19387626 | European journal of clinical pharmacology                                                 | 2009 | 3.032  |
| Warfarin | rs1057910          | 19538716 | Thrombosis journal                                                                        | 2009 |        |
| Warfarin | rs1057910          | 19582440 | European journal of clinical pharmacology                                                 | 2009 | 3.032  |
| Warfarin | rs1057910          | 19745563 | Drug metabolism and pharmacokinetics                                                      | 2009 | 2.558  |
| Warfarin | rs1057910          | 19794411 | Clinical pharmacology and therapeutics                                                    | 2010 | 6.378  |
| Warfarin | rs1057910          | 19874474 | Journal of thrombosis and haemostasis : JTH                                               | 2010 |        |
| Warfarin | rs1057910          | 19899329 | Pakistan journal of biological sciences: PJBBS                                            | 2009 |        |
| Warfarin | rs1057910          | 19941044 | Journal of pharmacokinetics and pharmacodynamics                                          | 2010 | 1.708  |
| Warfarin | rs1057910          | 19958090 | Pharmacogenomics                                                                          | 2009 | 3.876  |
| Warfarin | rs1057910          | 20020283 | European journal of clinical pharmacology                                                 | 2010 | 3.032  |
| Warfarin | rs1057910          | 20072124 | Clinical pharmacology and therapeutics                                                    | 2010 | 6.378  |
| Warfarin | rs1057910          | 20073138 | Ethnicity & disease                                                                       | 2009 | 1.03   |
| Warfarin | rs1057910          | 20339978 | Heart and vessels                                                                         | 2010 | 1.882  |
| Warfarin | rs1057910          | 20615525 | Thrombosis research                                                                       | 2010 | 2.372  |
| Warfarin | rs1057910          | 20637959 | Clinical therapeutics                                                                     | 2010 | 2.551  |
| Warfarin | rs1057910          | 20842355 | European journal of clinical pharmacology                                                 | 2010 | 3.032  |
| Warfarin | rs1057910          | 20884456 | Pakistan journal of pharmaceutical sciences                                               | 2010 | 0.728  |
| Warfarin | rs1057910          | 20930419 | Drug metabolism and pharmacokinetics                                                      | 2010 | 2.558  |
| Warfarin | rs1057910          | 21110192 | Annals of hematology                                                                      | 2011 | 2.688  |
| Warfarin | rs1057910          | 21127708 | Journal of biomedicine & biotechnology                                                    | 2011 | 1.23   |

|          |            |          |                                                                    |      |        |
|----------|------------|----------|--------------------------------------------------------------------|------|--------|
| Warfarin | rs1057910  | 21148049 | Journal of clinical pharmacology                                   | 2011 | 3.59   |
| Warfarin | rs1057910  | 21228733 | Pharmacogenetics and genomics                                      | 2011 | 3.865  |
| Warfarin | rs1057910  | 21321468 | International heart journal                                        | 2011 | 1.272  |
| Warfarin | rs1057910  | 21553655 | Die Pharmazie                                                      | 2011 | 0.869  |
| Warfarin | rs10919202 | 18535201 | Blood                                                              | 2008 | 10.558 |
| Warfarin | rs10920212 | 18535201 | Blood                                                              | 2008 | 10.558 |
| Warfarin | rs11150606 | 15883587 | The pharmacogenomics journal                                       | 2005 | 4.306  |
| Warfarin | rs11676382 | 17764537 | Journal of thrombosis and haemostasis : JTH                        | 2007 |        |
| Warfarin | rs11676382 | 20694283 | Thrombosis and haemostasis                                         | 2010 | 4.701  |
| Warfarin | rs11728293 | 18535201 | Blood                                                              | 2008 | 10.558 |
| Warfarin | rs11733360 | 18535201 | Blood                                                              | 2008 | 10.558 |
| Warfarin | rs11865472 | 18535201 | Blood                                                              | 2008 | 10.558 |
| Warfarin | rs12065184 | 18535201 | Blood                                                              | 2008 | 10.558 |
| Warfarin | rs12665384 | 18535201 | Blood                                                              | 2008 | 10.558 |
| Warfarin | rs13071953 | 18535201 | Blood                                                              | 2008 | 10.558 |
| Warfarin | rs13448    | 18535201 | Blood                                                              | 2008 | 10.558 |
| Warfarin | rs1490740  | 18535201 | Blood                                                              | 2008 | 10.558 |
| Warfarin | rs1543245  | 18535201 | Blood                                                              | 2008 | 10.558 |
| Warfarin | rs1572237  | 18535201 | Blood                                                              | 2008 | 10.558 |
| Warfarin | rs1635852  | 18535201 | Blood                                                              | 2008 | 10.558 |
| Warfarin | rs16846546 | 18535201 | Blood                                                              | 2008 | 10.558 |
| Warfarin | rs16894959 | 18535201 | Blood                                                              | 2008 | 10.558 |
| Warfarin | rs16991615 | 18535201 | Blood                                                              | 2008 | 10.558 |
| Warfarin | rs17002122 | 18535201 | Blood                                                              | 2008 | 10.558 |
| Warfarin | rs17708472 | 16270629 | Thrombosis and haemostasis                                         | 2005 | 4.701  |
| Warfarin | rs17708472 | 18680536 | Journal of thrombosis and haemostasis : JTH                        | 2008 |        |
| Warfarin | rs17784218 | 18535201 | Blood                                                              | 2008 | 10.558 |
| Warfarin | rs17878363 | 16270629 | Thrombosis and haemostasis                                         | 2005 | 4.701  |
| Warfarin | rs17878363 | 19875892 | Journal of applied genetics                                        | 2009 | 1.482  |
| Warfarin | rs17878544 | 20716240 | British journal of clinical pharmacology                           | 2010 | 3.063  |
| Warfarin | rs17880624 | 17391071 | Pharmacogenomics                                                   | 2007 | 3.876  |
| Warfarin | rs17880887 | 17391071 | Pharmacogenomics                                                   | 2007 | 3.876  |
| Warfarin | rs17880887 | 19745563 | Drug metabolism and pharmacokinetics                               | 2009 | 2.558  |
| Warfarin | rs17880887 | 21179214 | PLoS one                                                           | 2010 | 4.411  |
| Warfarin | rs17882154 | 17391071 | Pharmacogenomics                                                   | 2007 | 3.876  |
| Warfarin | rs17886369 | 17391071 | Pharmacogenomics                                                   | 2007 | 3.876  |
| Warfarin | rs1799808  | 19958090 | Pharmacogenomics                                                   | 2009 | 3.876  |
| Warfarin | rs1799853  | 10073515 | Lancet                                                             | 1999 | 33.633 |
| Warfarin | rs1799853  | 10961881 | Blood                                                              | 2000 | 10.558 |
| Warfarin | rs1799853  | 11893129 | Journal of the American College of Surgeons                        | 2002 | 4.241  |
| Warfarin | rs1799853  | 11926893 | JAMA : the journal of the American Medical Association             | 2002 | 30.011 |
| Warfarin | rs1799853  | 11966680 | British journal of clinical pharmacology                           | 2002 | 3.063  |
| Warfarin | rs1799853  | 12496751 | Clinical pharmacology and therapeutics                             | 2002 | 6.378  |
| Warfarin | rs1799853  | 12913403 | Journal of thrombosis and thrombolysis                             | 2002 | 1.539  |
| Warfarin | rs1799853  | 14691573 | Thrombosis and haemostasis                                         | 2004 | 4.701  |
| Warfarin | rs1799853  | 15001971 | Clinical pharmacology and therapeutics                             | 2004 | 6.378  |
| Warfarin | rs1799853  | 15001972 | Clinical pharmacology and therapeutics                             | 2004 | 6.378  |
| Warfarin | rs1799853  | 15070684 | Blood                                                              | 2004 | 10.558 |
| Warfarin | rs1799853  | 15175798 | Thrombosis and haemostasis                                         | 2004 | 4.701  |
| Warfarin | rs1799853  | 15284536 | Pharmacogenetics                                                   | 2004 |        |
| Warfarin | rs1799853  | 15608560 | Pharmacogenetics                                                   | 2004 |        |
| Warfarin | rs1799853  | 15617742 | Thrombosis research                                                | 2005 | 2.372  |
| Warfarin | rs1799853  | 15824753 | The pharmacogenomics journal                                       | 2005 | 4.306  |
| Warfarin | rs1799853  | 15883587 | The pharmacogenomics journal                                       | 2005 | 4.306  |
| Warfarin | rs1799853  | 15900281 | Clinical pharmacology and therapeutics                             | 2005 | 6.378  |
| Warfarin | rs1799853  | 15947090 | Blood                                                              | 2005 | 10.558 |
| Warfarin | rs1799853  | 16303885 | Clinical medicine & research                                       | 2005 |        |
| Warfarin | rs1799853  | 16321620 | Clinical pharmacology and therapeutics                             | 2005 | 6.378  |
| Warfarin | rs1799853  | 16580898 | Clinical pharmacology and therapeutics                             | 2006 | 6.378  |
| Warfarin | rs1799853  | 16815313 | Clinical pharmacology and therapeutics                             | 2006 | 6.378  |
| Warfarin | rs1799853  | 16890578 | Clinical pharmacology and therapeutics                             | 2006 | 6.378  |
| Warfarin | rs1799853  | 17167248 | Community genetics                                                 | 2007 | 1.538  |
| Warfarin | rs1799853  | 17226852 | Pediatric blood & cancer                                           | 2008 | 1.948  |
| Warfarin | rs1799853  | 17391071 | Pharmacogenomics                                                   | 2007 | 3.876  |
| Warfarin | rs1799853  | 17653141 | Clinical pharmacology and therapeutics                             | 2008 | 6.378  |
| Warfarin | rs1799853  | 17721328 | Diagnostic molecular pathology : the American journal of surgica   | 2007 | 2.129  |
| Warfarin | rs1799853  | 17955230 | European journal of clinical pharmacology                          | 2008 | 3.032  |
| Warfarin | rs1799853  | 18034618 | Pharmacogenomics                                                   | 2007 | 3.876  |
| Warfarin | rs1799853  | 18034619 | Pharmacogenomics                                                   | 2007 | 3.876  |
| Warfarin | rs1799853  | 18211619 | Journal of clinical pharmacy and therapeutics                      | 2008 | 1.649  |
| Warfarin | rs1799853  | 18322281 | The New England journal of medicine                                | 2008 | 53.486 |
| Warfarin | rs1799853  | 18542936 | European journal of clinical pharmacology                          | 2008 | 3.032  |
| Warfarin | rs1799853  | 18836275 | Medical principles and practice : international journal of the Kuw | 2008 | 1.069  |
| Warfarin | rs1799853  | 18855533 | Pharmacogenomics                                                   | 2008 | 3.876  |
| Warfarin | rs1799853  | 19297219 | Blood cells, molecules & diseases                                  | 2009 | 2.716  |
| Warfarin | rs1799853  | 19300499 | PLoS genetics                                                      | 2009 | 9.543  |
| Warfarin | rs1799853  | 19387626 | European journal of clinical pharmacology                          | 2009 | 3.032  |
| Warfarin | rs1799853  | 19538716 | Thrombosis journal                                                 | 2009 |        |
| Warfarin | rs1799853  | 19745563 | Drug metabolism and pharmacokinetics                               | 2009 | 2.558  |
| Warfarin | rs1799853  | 19794411 | Clinical pharmacology and therapeutics                             | 2010 | 6.378  |
| Warfarin | rs1799853  | 19874474 | Journal of thrombosis and haemostasis : JTH                        | 2010 |        |
| Warfarin | rs1799853  | 19899329 | Pakistan journal of biological sciences: PJBs                      | 2009 |        |

|          |                           |          |                                                  |      |        |
|----------|---------------------------|----------|--------------------------------------------------|------|--------|
| Warfarin | rs1799853                 | 19941044 | Journal of pharmacokinetics and pharmacodynamics | 2010 | 1.708  |
| Warfarin | rs1799853                 | 20072124 | Clinical pharmacology and therapeutics           | 2010 | 6.378  |
| Warfarin | rs1799853                 | 20073138 | Ethnicity & disease                              | 2009 | 1.03   |
| Warfarin | rs1799853                 | 20339978 | Heart and vessels                                | 2010 | 1.882  |
| Warfarin | rs1799853                 | 20615525 | Thrombosis research                              | 2010 | 2.372  |
| Warfarin | rs1799853                 | 20637959 | Clinical therapeutics                            | 2010 | 2.551  |
| Warfarin | rs1799853                 | 20884456 | Pakistan journal of pharmaceutical sciences      | 2010 | 0.728  |
| Warfarin | rs1799853                 | 20930419 | Drug metabolism and pharmacokinetics             | 2010 | 2.558  |
| Warfarin | rs1799853                 | 21110192 | Annals of hematology                             | 2011 | 2.688  |
| Warfarin | rs1799853                 | 21127708 | Journal of biomedicine & biotechnology           | 2011 | 1.23   |
| Warfarin | rs1799853                 | 21228733 | Pharmacogenetics and genomics                    | 2011 | 3.865  |
| Warfarin | rs1799853                 | 21321468 | International heart journal                      | 2011 | 1.272  |
| Warfarin | rs1799963                 | 14656880 | Blood                                            | 2004 | 10.558 |
| Warfarin | rs1799963                 | 15590403 | Haematologica                                    | 2004 | 6.532  |
| Warfarin | rs1800566                 | 18535201 | Blood                                            | 2008 | 10.558 |
| Warfarin | rs2022212                 | 18535201 | Blood                                            | 2008 | 10.558 |
| Warfarin | rs2108622                 | 18250228 | Blood                                            | 2008 | 10.558 |
| Warfarin | rs2108622                 | 19300499 | PLoS genetics                                    | 2009 | 9.543  |
| Warfarin | rs2108622                 | 19741565 | Pharmacogenetics and genomics                    | 2009 | 3.865  |
| Warfarin | rs2108622                 | 20182420 | Clinical pharmacology and therapeutics           | 2010 | 6.378  |
| Warfarin | rs2108622                 | 20833655 | Human molecular genetics                         | 2010 | 8.058  |
| Warfarin | rs2108622                 | 21084764 | Drug metabolism and pharmacokinetics             | 2011 | 2.558  |
| Warfarin | rs2137619                 | 18535201 | Blood                                            | 2008 | 10.558 |
| Warfarin | rs216013                  | 18535201 | Blood                                            | 2008 | 10.558 |
| Warfarin | rs2189784                 | 18535201 | Blood                                            | 2008 | 10.558 |
| Warfarin | rs2235015                 | 18535201 | Blood                                            | 2008 | 10.558 |
| Warfarin | rs2286461                 | 18535201 | Blood                                            | 2008 | 10.558 |
| Warfarin | rs2292566                 | 19794411 | Clinical pharmacology and therapeutics           | 2010 | 6.378  |
| Warfarin | rs2305668                 | 18535201 | Blood                                            | 2008 | 10.558 |
| Warfarin | rs2359612                 | 15883587 | The pharmacogenomics journal                     | 2005 | 4.306  |
| Warfarin | rs2359612                 | 16270629 | Thrombosis and haemostasis                       | 2005 | 4.701  |
| Warfarin | rs2359612                 | 16611750 | Journal of medical genetics                      | 2006 | 7.037  |
| Warfarin | rs2359612                 | 18030307 | Clinical pharmacology and therapeutics           | 2008 | 6.378  |
| Warfarin | rs2359612                 | 18322281 | The New England journal of medicine              | 2008 | 53.486 |
| Warfarin | rs2359612                 | 19745563 | Drug metabolism and pharmacokinetics             | 2009 | 2.558  |
| Warfarin | rs2359612                 | 19958090 | Pharmacogenomics                                 | 2009 | 3.876  |
| Warfarin | rs2359612                 | 20203262 | Blood                                            | 2010 | 10.558 |
| Warfarin | rs2359612                 | 21127708 | Journal of biomedicine & biotechnology           | 2011 | 1.23   |
| Warfarin | rs2359612                 | 21179214 | PLoS one                                         | 2010 | 4.411  |
| Warfarin | rs2589949                 | 18535201 | Blood                                            | 2008 | 10.558 |
| Warfarin | rs2814944                 | 18535201 | Blood                                            | 2008 | 10.558 |
| Warfarin | rs28371685                | 15970795 | Pharmacogenetics and genomics                    | 2005 | 3.865  |
| Warfarin | rs28371685                | 17653141 | Clinical pharmacology and therapeutics           | 2008 | 6.378  |
| Warfarin | rs28371685                | 18855533 | Pharmacogenomics                                 | 2008 | 3.876  |
| Warfarin | rs28371685                | 19297219 | Blood cells, molecules & diseases                | 2009 | 2.716  |
| Warfarin | rs28371685                | 19387626 | European journal of clinical pharmacology        | 2009 | 3.032  |
| Warfarin | rs28371685                | 20072124 | Clinical pharmacology and therapeutics           | 2010 | 6.378  |
| Warfarin | rs28371686                | 16580898 | Clinical pharmacology and therapeutics           | 2006 | 6.378  |
| Warfarin | rs28371686                | 17653141 | Clinical pharmacology and therapeutics           | 2008 | 6.378  |
| Warfarin | rs28371686                | 18034618 | Pharmacogenomics                                 | 2007 | 3.876  |
| Warfarin | rs28371686                | 18322281 | The New England journal of medicine              | 2008 | 53.486 |
| Warfarin | rs28371686                | 18542936 | European journal of clinical pharmacology        | 2008 | 3.032  |
| Warfarin | rs28371686                | 18855533 | Pharmacogenomics                                 | 2008 | 3.876  |
| Warfarin | rs28371686                | 19297219 | Blood cells, molecules & diseases                | 2009 | 2.716  |
| Warfarin | rs28371686                | 19387626 | European journal of clinical pharmacology        | 2009 | 3.032  |
| Warfarin | rs28371686                | 20072124 | Clinical pharmacology and therapeutics           | 2010 | 6.378  |
| Warfarin | rs28371686                | 21228733 | Pharmacogenetics and genomics                    | 2011 | 3.865  |
| Warfarin | rs2859720                 | 18535201 | Blood                                            | 2008 | 10.558 |
| Warfarin | rs2884737                 | 16611750 | Journal of medical genetics                      | 2006 | 7.037  |
| Warfarin | rs2884737                 | 18030307 | Clinical pharmacology and therapeutics           | 2008 | 6.378  |
| Warfarin | rs2884737                 | 18322281 | The New England journal of medicine              | 2008 | 53.486 |
| Warfarin | rs2884737                 | 19745563 | Drug metabolism and pharmacokinetics             | 2009 | 2.558  |
| Warfarin | rs2884737                 | 20072124 | Clinical pharmacology and therapeutics           | 2010 | 6.378  |
| Warfarin | rs2884737                 | 21179214 | PLoS one                                         | 2010 | 4.411  |
| Warfarin | rs3000802                 | 18535201 | Blood                                            | 2008 | 10.558 |
| Warfarin | rs339097                  | 20200517 | Clinical pharmacology and therapeutics           | 2010 | 6.378  |
| Warfarin | rs360097                  | 18535201 | Blood                                            | 2008 | 10.558 |
| Warfarin | rs3778760                 | 18535201 | Blood                                            | 2008 | 10.558 |
| Warfarin | rs3858304                 | 18535201 | Blood                                            | 2008 | 10.558 |
| Warfarin | rs4086116                 | 18535201 | Blood                                            | 2008 | 10.558 |
| Warfarin | rs4244285                 | 16890578 | Clinical pharmacology and therapeutics           | 2006 | 6.378  |
| Warfarin | rs429358/rs7412 haplotype | 15952022 | European journal of clinical pharmacology        | 2005 | 3.032  |
| Warfarin | rs429358/rs7412 haplotype | 16847429 | Pharmacogenetics and genomics                    | 2006 | 3.865  |
| Warfarin | rs429358/rs7412 haplotype | 21228733 | Pharmacogenetics and genomics                    | 2011 | 3.865  |
| Warfarin | rs4646450                 | 18535201 | Blood                                            | 2008 | 10.558 |
| Warfarin | rs4653436                 | 20842355 | European journal of clinical pharmacology        | 2010 | 3.032  |
| Warfarin | rs488703                  | 18535201 | Blood                                            | 2008 | 10.558 |
| Warfarin | rs4917639                 | 18535201 | Blood                                            | 2008 | 10.558 |
| Warfarin | rs4918758                 | 20653674 | British journal of clinical pharmacology         | 2010 | 3.063  |
| Warfarin | rs4986893                 | 16890578 | Clinical pharmacology and therapeutics           | 2006 | 6.378  |
| Warfarin | rs549427                  | 18535201 | Blood                                            | 2008 | 10.558 |
| Warfarin | rs56165452                | 17391071 | Pharmacogenomics                                 | 2007 | 3.876  |



|          |            |          |                                                                             |      |        |
|----------|------------|----------|-----------------------------------------------------------------------------|------|--------|
| Warfarin | rs56165452 | 18542936 | European journal of clinical pharmacology                                   | 2008 | 3.032  |
| Warfarin | rs56165452 | 19387626 | European journal of clinical pharmacology                                   | 2009 | 3.032  |
| Warfarin | rs56165452 | 21228733 | Pharmacogenetics and genomics                                               | 2011 | 3.865  |
| Warfarin | rs5896     | 14656880 | Blood                                                                       | 2004 | 10.558 |
| Warfarin | rs5936     | 19958090 | Pharmacogenomics                                                            | 2009 | 3.876  |
| Warfarin | rs5985     | 16102108 | Journal of thrombosis and haemostasis : JTH                                 | 2005 |        |
| Warfarin | rs61162043 | 21270790 | Clinical pharmacology and therapeutics                                      | 2011 | 6.378  |
| Warfarin | rs61742245 | 17110455 | Blood                                                                       | 2007 | 10.558 |
| Warfarin | rs6643     | 18535201 | Blood                                                                       | 2008 | 10.558 |
| Warfarin | rs699664   | 17049586 | Thrombosis research                                                         | 2007 | 2.372  |
| Warfarin | rs7089580  | 21270790 | Clinical pharmacology and therapeutics                                      | 2011 | 6.378  |
| Warfarin | rs719473   | 18535201 | Blood                                                                       | 2008 | 10.558 |
| Warfarin | rs7196161  | 19745563 | Drug metabolism and pharmacokinetics                                        | 2009 | 2.558  |
| Warfarin | rs7196161  | 21179214 | PLoS one                                                                    | 2010 | 4.411  |
| Warfarin | rs72558187 | 19077919 | Pharmacogenetics and genomics                                               | 2009 | 3.865  |
| Warfarin | rs72558189 | 19077919 | Pharmacogenetics and genomics                                               | 2009 | 3.865  |
| Warfarin | rs72558192 | 15888487 | Human molecular genetics                                                    | 2005 | 8.058  |
| Warfarin | rs7294     | 15883587 | The pharmacogenomics journal                                                | 2005 | 4.306  |
| Warfarin | rs7294     | 16270629 | Thrombosis and haemostasis                                                  | 2005 | 4.701  |
| Warfarin | rs7294     | 16611750 | Journal of medical genetics                                                 | 2006 | 7.037  |
| Warfarin | rs7294     | 16676068 | Thrombosis and haemostasis                                                  | 2006 | 4.701  |
| Warfarin | rs7294     | 17049586 | Thrombosis research                                                         | 2007 | 2.372  |
| Warfarin | rs7294     | 18030307 | Clinical pharmacology and therapeutics                                      | 2008 | 6.378  |
| Warfarin | rs7294     | 18034619 | Pharmacogenomics                                                            | 2007 | 3.876  |
| Warfarin | rs7294     | 18680536 | Journal of thrombosis and haemostasis : JTH                                 | 2008 |        |
| Warfarin | rs7294     | 19745563 | Drug metabolism and pharmacokinetics                                        | 2009 | 2.558  |
| Warfarin | rs7294     | 19942260 | Thrombosis research                                                         | 2010 | 2.372  |
| Warfarin | rs7294     | 19958090 | Pharmacogenomics                                                            | 2009 | 3.876  |
| Warfarin | rs7294     | 21179214 | PLoS one                                                                    | 2010 | 4.411  |
| Warfarin | rs7590705  | 18535201 | Blood                                                                       | 2008 | 10.558 |
| Warfarin | rs762637   | 14656880 | Blood                                                                       | 2004 | 10.558 |
| Warfarin | rs762637   | 19387626 | European journal of clinical pharmacology                                   | 2009 | 3.032  |
| Warfarin | rs7896133  | 18535201 | Blood                                                                       | 2008 | 10.558 |
| Warfarin | rs7896133  | 19958090 | Pharmacogenomics                                                            | 2009 | 3.876  |
| Warfarin | rs7900194  | 20072124 | Clinical pharmacology and therapeutics                                      | 2010 | 6.378  |
| Warfarin | rs7900194  | 21228733 | Pharmacogenetics and genomics                                               | 2011 | 3.865  |
| Warfarin | rs7981123  | 15590403 | Haematologica                                                               | 2004 | 6.532  |
| Warfarin | rs8050894  | 16493479 | Thrombosis and haemostasis                                                  | 2006 | 4.701  |
| Warfarin | rs8050894  | 16611750 | Journal of medical genetics                                                 | 2006 | 7.037  |
| Warfarin | rs8050894  | 17456829 | Clinical medicine & research                                                | 2007 |        |
| Warfarin | rs8050894  | 18030307 | Clinical pharmacology and therapeutics                                      | 2008 | 6.378  |
| Warfarin | rs8050894  | 18322281 | The New England journal of medicine                                         | 2008 | 53.486 |
| Warfarin | rs8050894  | 19874474 | Journal of thrombosis and haemostasis : JTH                                 | 2010 |        |
| Warfarin | rs8050894  | 19958090 | Pharmacogenomics                                                            | 2009 | 3.876  |
| Warfarin | rs8050894  | 20203262 | Blood                                                                       | 2010 | 10.558 |
| Warfarin | rs8050894  | 21127708 | Journal of biomedicine & biotechnology                                      | 2011 | 1.23   |
| Warfarin | rs8050984  | 19745563 | Drug metabolism and pharmacokinetics                                        | 2009 | 2.558  |
| Warfarin | rs8050984  | 21179214 | PLoS one                                                                    | 2010 | 4.411  |
| Warfarin | rs8101274  | 18535201 | Blood                                                                       | 2008 | 10.558 |
| Warfarin | rs8109507  | 18535201 | Blood                                                                       | 2008 | 10.558 |
| Warfarin | rs913068   | 18535201 | Blood                                                                       | 2008 | 10.558 |
| Warfarin | rs9332096  | 20653674 | British journal of clinical pharmacology                                    | 2010 | 3.063  |
| Warfarin | rs9332127  | 20842355 | European journal of clinical pharmacology                                   | 2010 | 3.032  |
| Warfarin | rs9332130  | 17653141 | Clinical pharmacology and therapeutics                                      | 2008 | 6.378  |
| Warfarin | rs9332131  | 17653141 | Clinical pharmacology and therapeutics                                      | 2008 | 6.378  |
| Warfarin | rs9332131  | 18855533 | Pharmacogenomics                                                            | 2008 | 3.876  |
| Warfarin | rs9332131  | 19297219 | Blood cells, molecules & diseases                                           | 2009 | 2.716  |
| Warfarin | rs9332131  | 20072124 | Clinical pharmacology and therapeutics                                      | 2010 | 6.378  |
| Warfarin | rs9550270  | 18535201 | Blood                                                                       | 2008 | 10.558 |
| Warfarin | rs9923231  | 15883587 | The pharmacogenomics journal                                                | 2005 | 4.306  |
| Warfarin | rs9923231  | 15888487 | Human molecular genetics                                                    | 2005 | 8.058  |
| Warfarin | rs9923231  | 15947090 | Blood                                                                       | 2005 | 10.558 |
| Warfarin | rs9923231  | 16270629 | Thrombosis and haemostasis                                                  | 2005 | 4.701  |
| Warfarin | rs9923231  | 16580898 | Clinical pharmacology and therapeutics                                      | 2006 | 6.378  |
| Warfarin | rs9923231  | 16611310 | British journal of haematology                                              | 2006 | 4.942  |
| Warfarin | rs9923231  | 16890578 | Clinical pharmacology and therapeutics                                      | 2006 | 6.378  |
| Warfarin | rs9923231  | 17049586 | Thrombosis research                                                         | 2007 | 2.372  |
| Warfarin | rs9923231  | 17510308 | Clinical chemistry                                                          | 2007 | 6.886  |
| Warfarin | rs9923231  | 17721328 | Diagnostic molecular pathology : the American journal of surgical pathology | 2007 | 2.129  |
| Warfarin | rs9923231  | 17899045 | European journal of clinical pharmacology                                   | 2007 | 3.032  |
| Warfarin | rs9923231  | 18030307 | Clinical pharmacology and therapeutics                                      | 2008 | 6.378  |
| Warfarin | rs9923231  | 18183038 | Clinical pharmacology and therapeutics                                      | 2008 | 6.378  |
| Warfarin | rs9923231  | 18322281 | The New England journal of medicine                                         | 2008 | 53.486 |
| Warfarin | rs9923231  | 18535201 | Blood                                                                       | 2008 | 10.558 |
| Warfarin | rs9923231  | 18542936 | European journal of clinical pharmacology                                   | 2008 | 3.032  |
| Warfarin | rs9923231  | 18855533 | Pharmacogenomics                                                            | 2008 | 3.876  |
| Warfarin | rs9923231  | 19135231 | Thrombosis research                                                         | 2009 | 2.372  |
| Warfarin | rs9923231  | 19300499 | PLoS genetics                                                               | 2009 | 9.543  |
| Warfarin | rs9923231  | 19387626 | European journal of clinical pharmacology                                   | 2009 | 3.032  |
| Warfarin | rs9923231  | 19538716 | Thrombosis journal                                                          | 2009 |        |
| Warfarin | rs9923231  | 19582440 | European journal of clinical pharmacology                                   | 2009 | 3.032  |
| Warfarin | rs9923231  | 19745563 | Drug metabolism and pharmacokinetics                                        | 2009 | 2.558  |

|          |                    |          |                                                                 |      |        |
|----------|--------------------|----------|-----------------------------------------------------------------|------|--------|
| Warfarin | rs9923231          | 19794411 | Clinical pharmacology and therapeutics                          | 2010 | 6.378  |
| Warfarin | rs9923231          | 19874474 | Journal of thrombosis and haemostasis : JTH                     | 2010 |        |
| Warfarin | rs9923231          | 19942260 | Thrombosis research                                             | 2010 | 2.372  |
| Warfarin | rs9923231          | 19958090 | Pharmacogenomics                                                | 2009 | 3.876  |
| Warfarin | rs9923231          | 20072124 | Clinical pharmacology and therapeutics                          | 2010 | 6.378  |
| Warfarin | rs9923231          | 20073138 | Ethnicity & disease                                             | 2009 | 1.03   |
| Warfarin | rs9923231          | 20203262 | Blood                                                           | 2010 | 10.558 |
| Warfarin | rs9923231          | 20615525 | Thrombosis research                                             | 2010 | 2.372  |
| Warfarin | rs9923231          | 20637959 | Clinical therapeutics                                           | 2010 | 2.551  |
| Warfarin | rs9923231          | 20833655 | Human molecular genetics                                        | 2010 | 8.058  |
| Warfarin | rs9923231          | 20842355 | European journal of clinical pharmacology                       | 2010 | 3.032  |
| Warfarin | rs9923231          | 20930419 | Drug metabolism and pharmacokinetics                            | 2010 | 2.558  |
| Warfarin | rs9923231          | 21110192 | Annals of hematology                                            | 2011 | 2.688  |
| Warfarin | rs9923231          | 21148049 | Journal of clinical pharmacology                                | 2011 | 3.59   |
| Warfarin | rs9923231          | 21176721 | International journal of clinical pharmacology and therapeutics | 2011 | 1.189  |
| Warfarin | rs9923231          | 21179214 | PloS one                                                        | 2010 | 4.411  |
| Warfarin | rs9923231          | 21228733 | Pharmacogenetics and genomics                                   | 2011 | 3.865  |
| Warfarin | rs9923231          | 21553655 | Die Pharmazie                                                   | 2011 | 0.869  |
| Warfarin | rs9923231          | 21747589 | Indian journal of human genetics                                | 2011 |        |
| Warfarin | rs9934438          | 15358623 | Blood                                                           | 2005 | 10.558 |
| Warfarin | rs9934438          | 15883587 | The pharmacogenomics journal                                    | 2005 | 4.306  |
| Warfarin | rs9934438          | 16270629 | Thrombosis and haemostasis                                      | 2005 | 4.701  |
| Warfarin | rs9934438          | 16611750 | Journal of medical genetics                                     | 2006 | 7.037  |
| Warfarin | rs9934438          | 16676068 | Thrombosis and haemostasis                                      | 2006 | 4.701  |
| Warfarin | rs9934438          | 16815313 | Clinical pharmacology and therapeutics                          | 2006 | 6.378  |
| Warfarin | rs9934438          | 16821005 | European journal of clinical pharmacology                       | 2006 | 3.032  |
| Warfarin | rs9934438          | 17031720 | Pediatric cardiology                                            | 2006 | 1.237  |
| Warfarin | rs9934438          | 17329985 | Clinical pharmacology and therapeutics                          | 2007 | 6.378  |
| Warfarin | rs9934438          | 17391071 | Pharmacogenomics                                                | 2007 | 3.876  |
| Warfarin | rs9934438          | 18030307 | Clinical pharmacology and therapeutics                          | 2008 | 6.378  |
| Warfarin | rs9934438          | 18034619 | Pharmacogenomics                                                | 2007 | 3.876  |
| Warfarin | rs9934438          | 18240904 | Pharmacogenomics                                                | 2007 | 3.876  |
| Warfarin | rs9934438          | 18322281 | The New England journal of medicine                             | 2008 | 53.486 |
| Warfarin | rs9934438          | 18680536 | Journal of thrombosis and haemostasis : JTH                     | 2008 |        |
| Warfarin | rs9934438          | 18855533 | Pharmacogenomics                                                | 2008 | 3.876  |
| Warfarin | rs9934438          | 19077919 | Pharmacogenetics and genomics                                   | 2009 | 3.865  |
| Warfarin | rs9934438          | 19297219 | Blood cells, molecules & diseases                               | 2009 | 2.716  |
| Warfarin | rs9934438          | 19745563 | Drug metabolism and pharmacokinetics                            | 2009 | 2.558  |
| Warfarin | rs9934438          | 19942260 | Thrombosis research                                             | 2010 | 2.372  |
| Warfarin | rs9934438          | 19958090 | Pharmacogenomics                                                | 2009 | 3.876  |
| Warfarin | rs9934438          | 20020283 | European journal of clinical pharmacology                       | 2010 | 3.032  |
| Warfarin | rs9934438          | 20203262 | Blood                                                           | 2010 | 10.558 |
| Warfarin | rs9934438          | 20930419 | Drug metabolism and pharmacokinetics                            | 2010 | 2.558  |
| Warfarin | rs9934438          | 21176721 | International journal of clinical pharmacology and therapeutics | 2011 | 1.189  |
| Warfarin | rs9934438          | 21179214 | PloS one                                                        | 2010 | 4.411  |
| Warfarin | rs9934438          | 21321468 | International heart journal                                     | 2011 | 1.272  |
| Warfarin | VKORC1 -1413A>G    | 16432637 | Journal of human genetics                                       | 2006 | 2.496  |
| Warfarin | VKORC1 113A>C      | 16890578 | Clinical pharmacology and therapeutics                          | 2006 | 6.378  |
| Warfarin | VKORC1 343G>A      | 16432637 | Journal of human genetics                                       | 2006 | 2.496  |
| Warfarin | VKORC1 IVS1-136T>C | 16432637 | Journal of human genetics                                       | 2006 | 2.496  |
| Warfarin | VKORC1 IVS2+124C>G | 16432637 | Journal of human genetics                                       | 2006 | 2.496  |
| Warfarin | VKORC1 IVS2+837T>C | 16432637 | Journal of human genetics                                       | 2006 | 2.496  |
