# Supplementary material
Source: PubMed Central journal article supplement (PMC4475352)
Supplement: NIHMS676556-supplement-5.pdf [file NIHMS676556-supplement-5.pdf]

## **Supplementary Information**

### **Appendices Legends**

#### Appendix A

List of the 71 cardiovascular drugs with known or probable pharmacogenomic associations comprehensively searched and analyzed.

#### Appendix B

The items comprising the modified AGREE II instrument are shown here.

#### Appendix C

List of the 884 drug/variant pairs, along with associated PMID(s), identified through literature search. Those drug/variant pairs determined to warrant a proposed clinical implementation summary are bolded.

### **Supplementary Figure Legend**

Supplementary Figure 1. Clinical summaries for results delivery for given genotypes of (A) pravastatin, (B) carvedilol, (C) atorvastatin, (D) atenolol, and (E) verapamil.

The creation of a clinical implementation summary (genotype-specific pharmacogenomic result with clinical decision support), which informs physicians of important pharmacogenomic information, was our measure of the ultimate clinical applicability of a specific drug/variant pair. Each summary contains an interpretation of the evidence, the assigned Level of Evidence rating, and hyperlinks to the primary literature evidence forming the basis for the summary.
